# Supplementary material for: Immunohistochemistry and Mutation Analysis of SDHx Genes in Carotid Paragangliomas
Source: MDPI journal article supplement (doi:10.3390/ijms21186950), 2020-09-22

**Pat02**

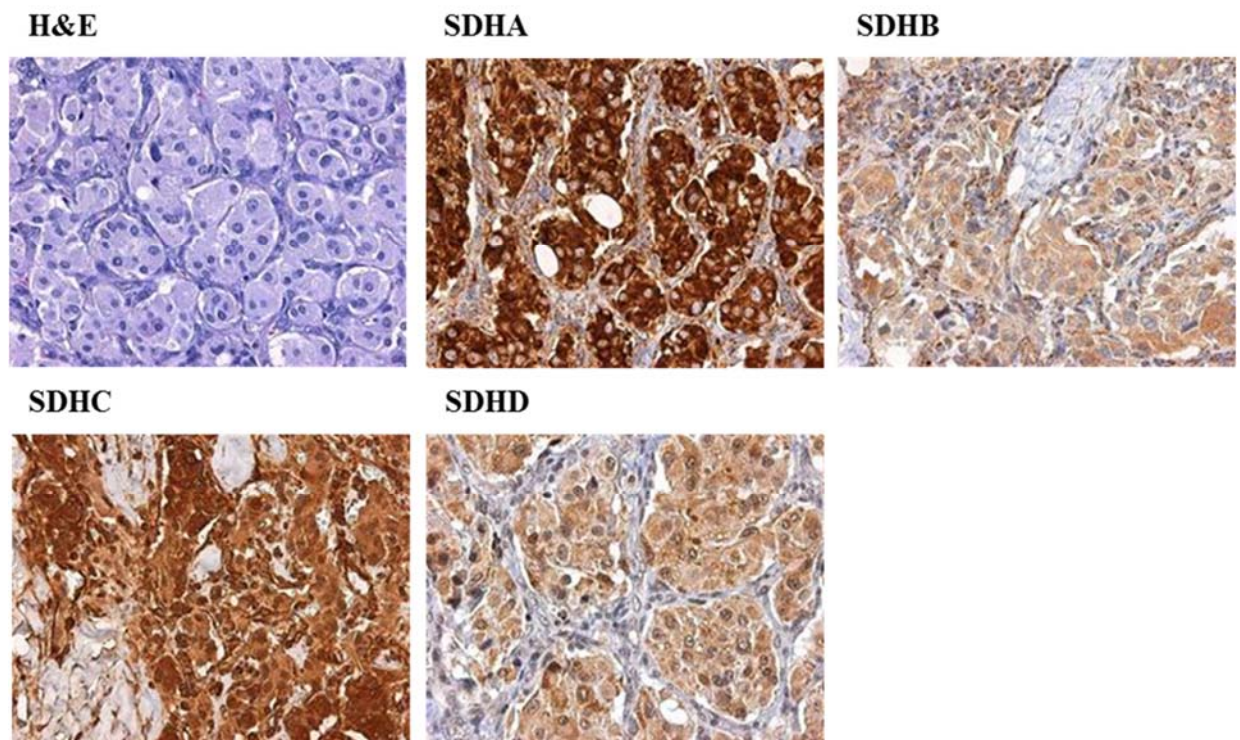

**Pat03**

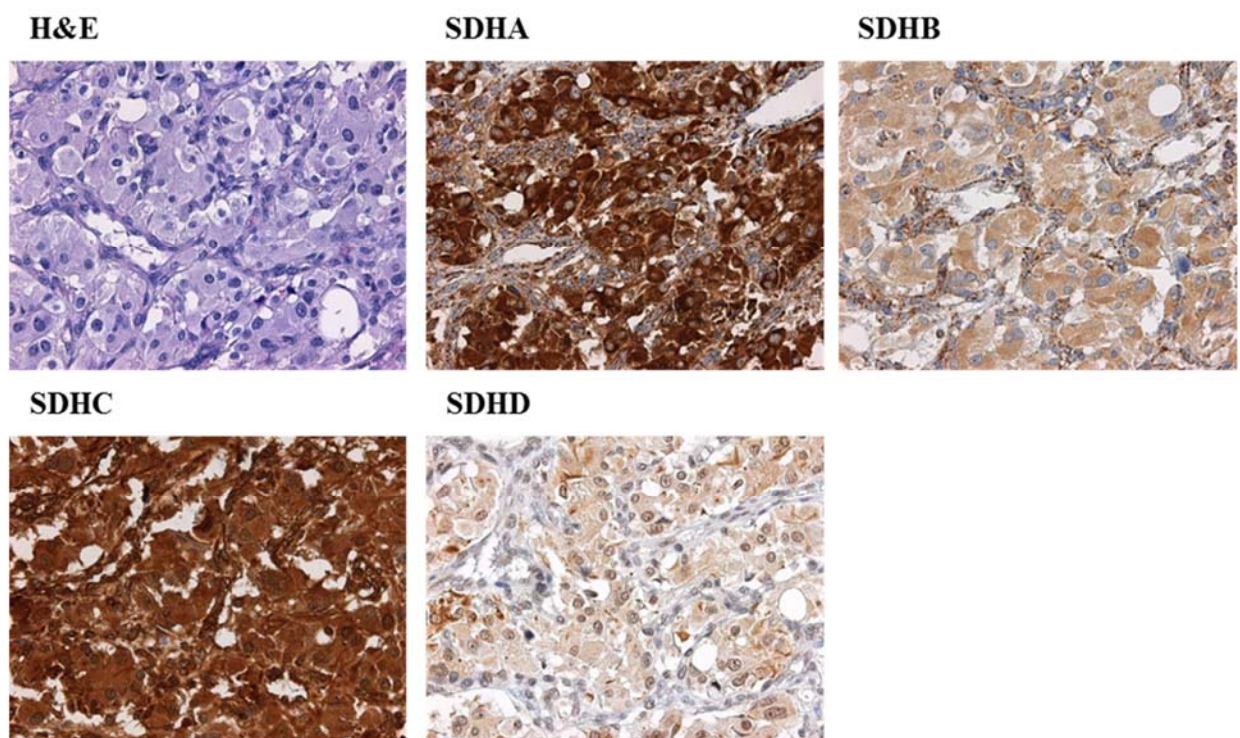



**Pat04**

**H&E**

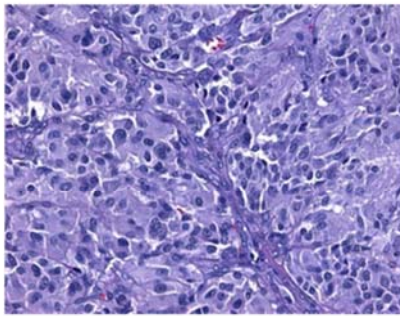

**SDHA**

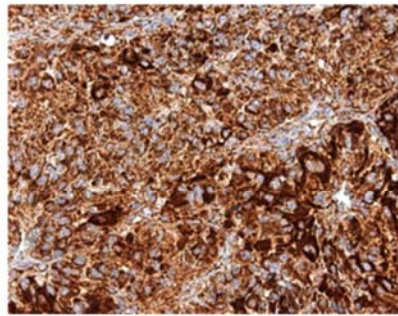

**SDHB**

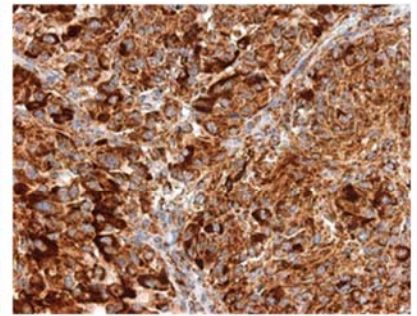

**SDHC**

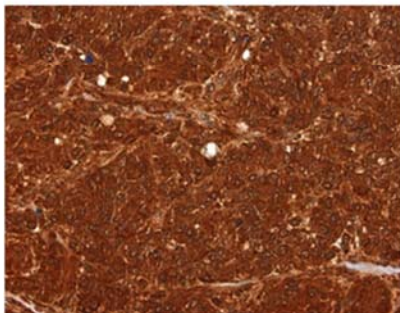

**SDHD**

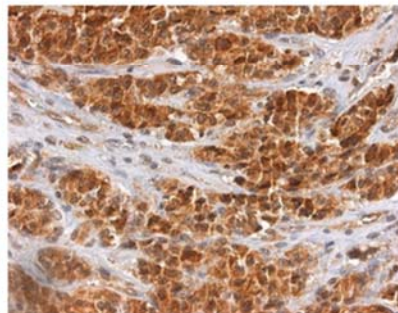

**Pat05**

**H&E**

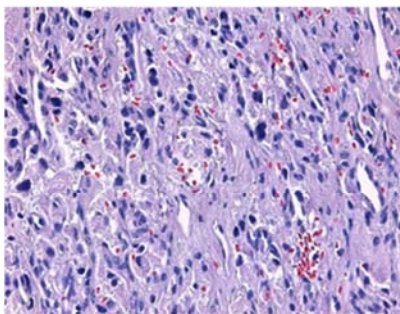

**SDHA**

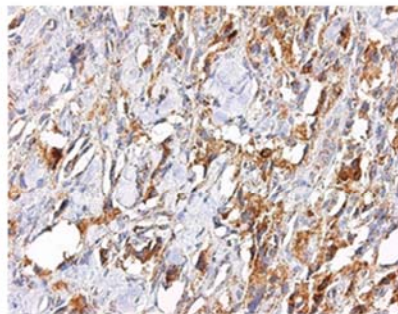

**SDHB**

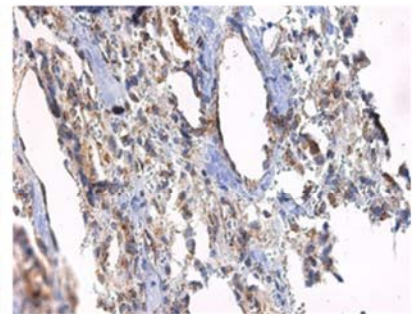

**SDHC**

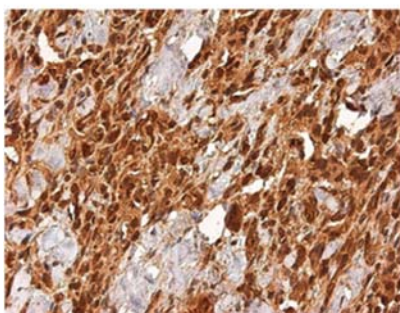

**SDHD**

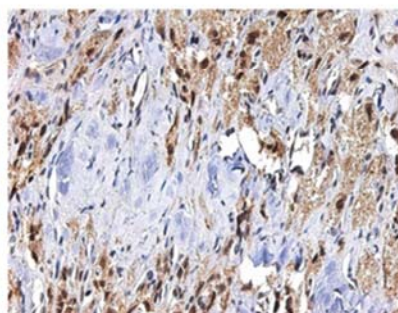



**Pat06**

**H&E**

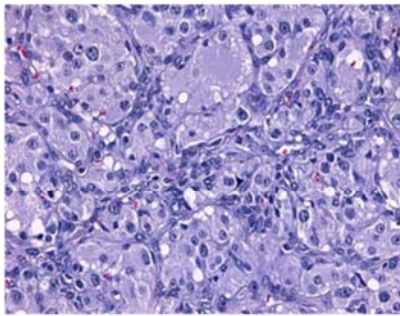

**SDHA**

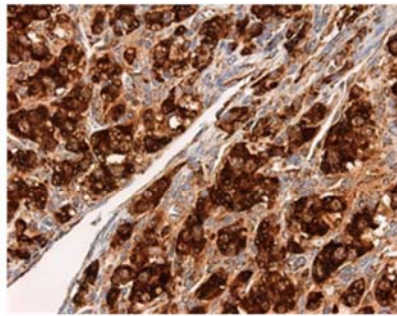

**SDHB**

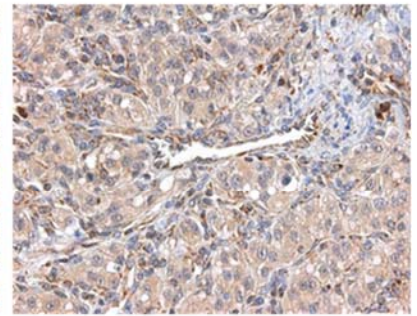

**SDHC**

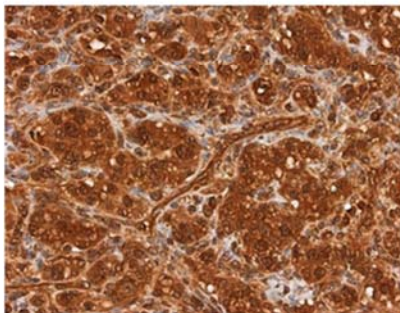

**SDHD**

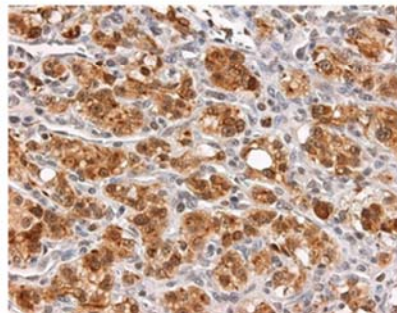

**Pat07**

**H&E**

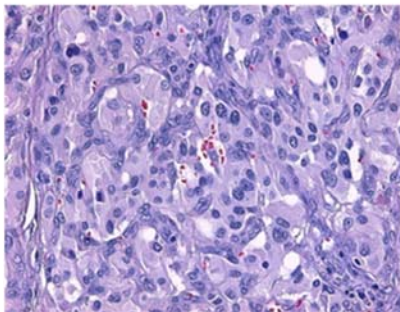

**SDHA**

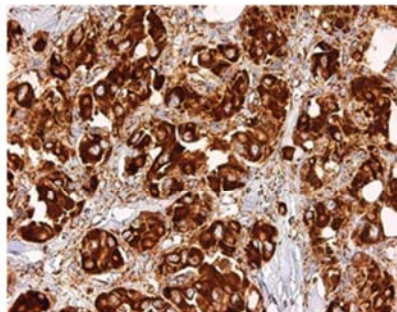

**SDHB**

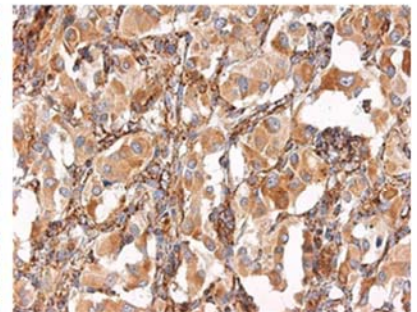

**SDHC**

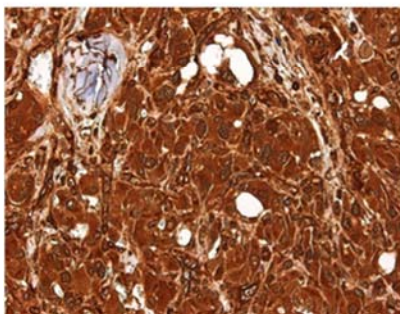

**SDHD**

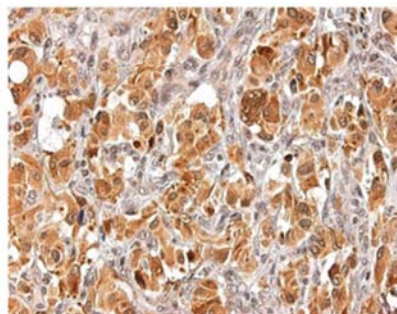



**Pat08**

**H&E**

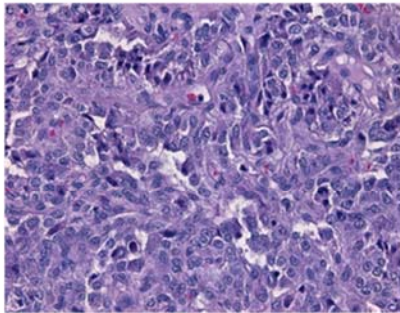

**SDHA**

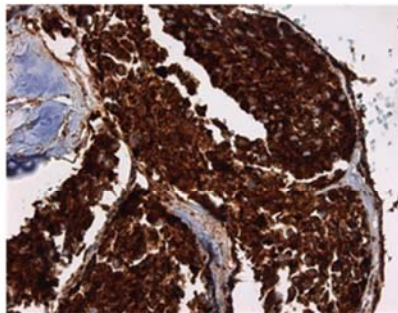

**SDHB**

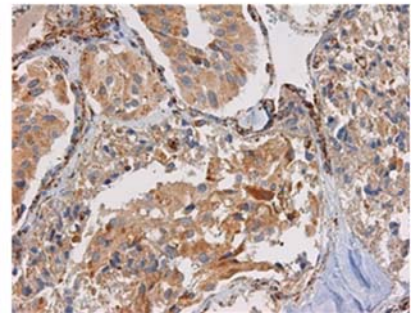

**SDHC**

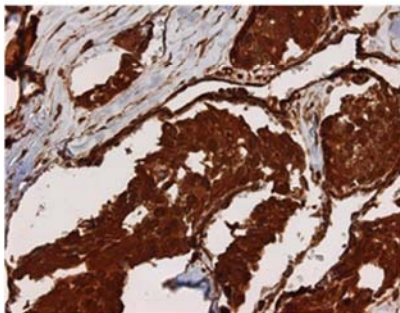

**SDHD**

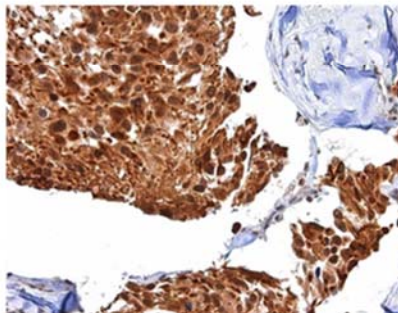

**Pat09**

**H&E**

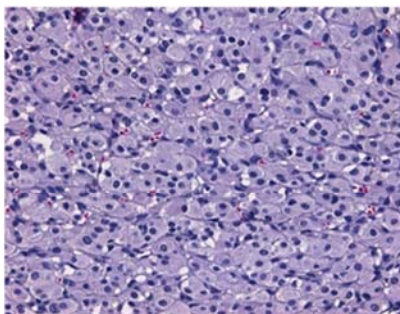

**SDHA**

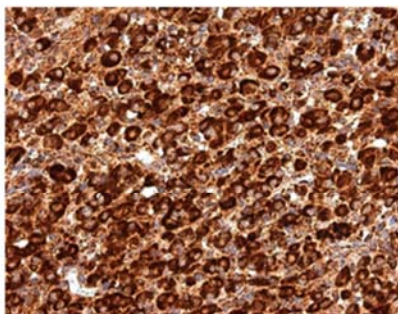

**SDHB**

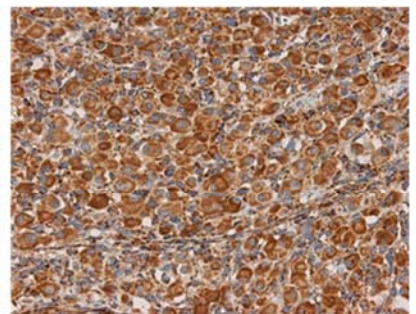

**SDHC**

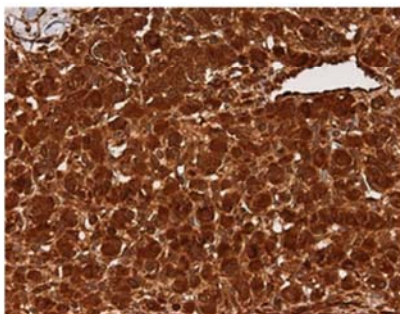

**SDHD**

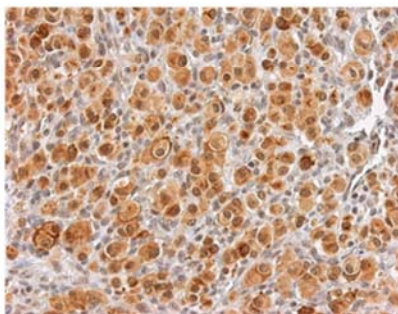



**Pat10**

**H&E**

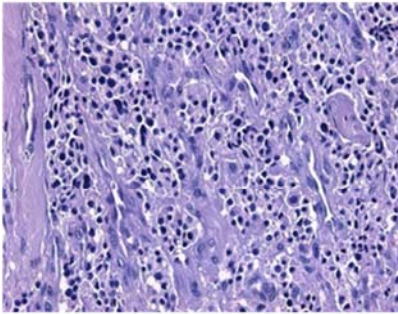

**SDHA**

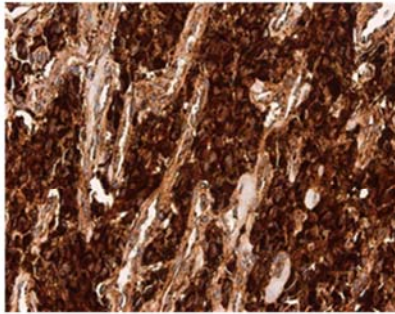

**SDHB**

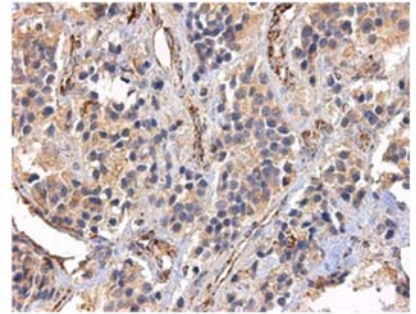

**SDHC**

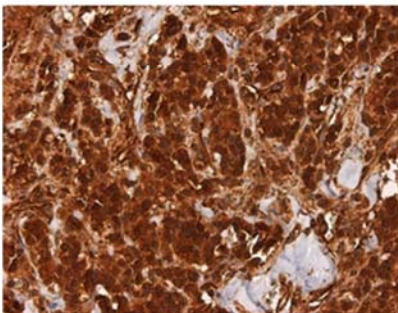

**SDHD**

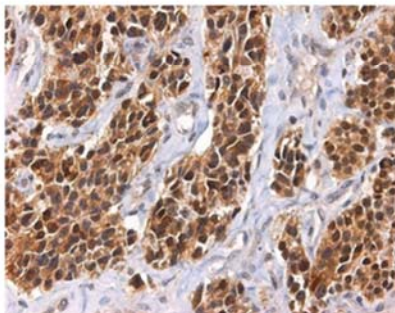

**Pat12**

**H&E**

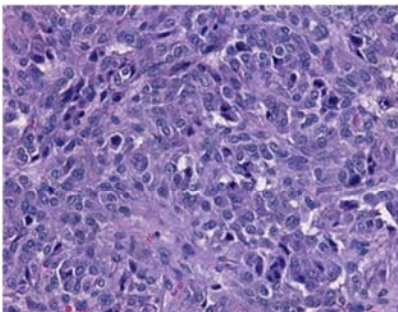

**SDHA**

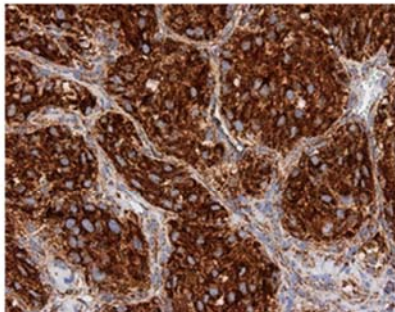

**SDHB**

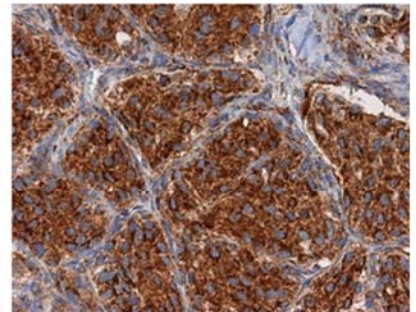

**SDHC**

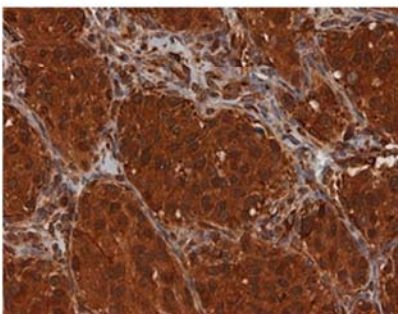

**SDHD**

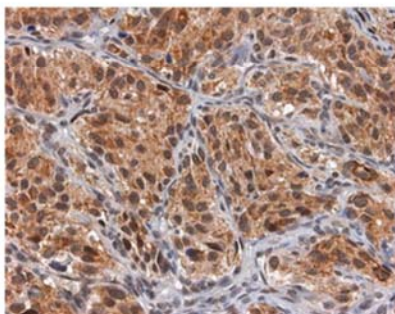



**Pat14**

**H&E**

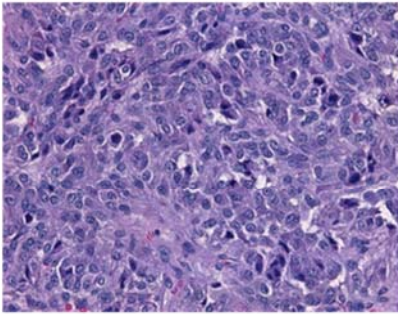

**SDHA**

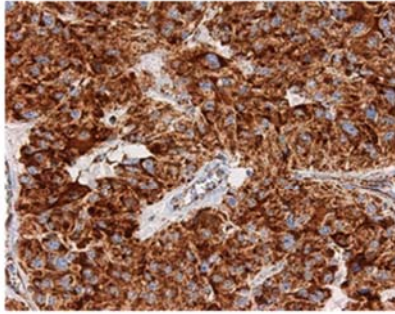

**SDHB**

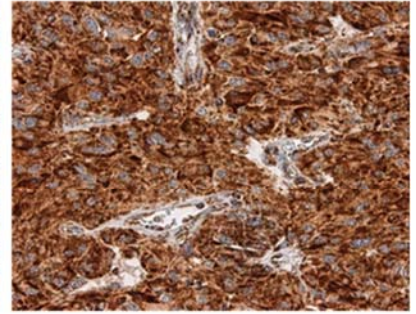

**SDHC**

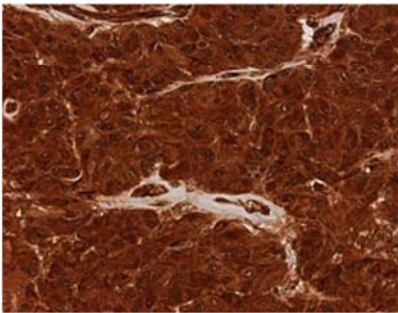

**SDHD**

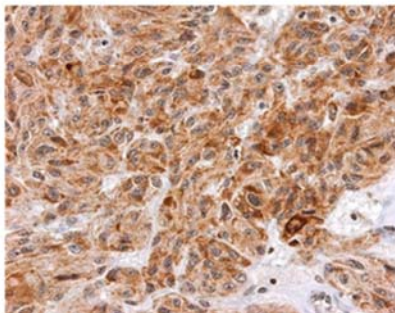

**Pat16**

**H&E**

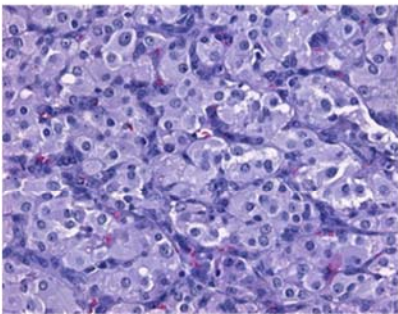

**SDHA**

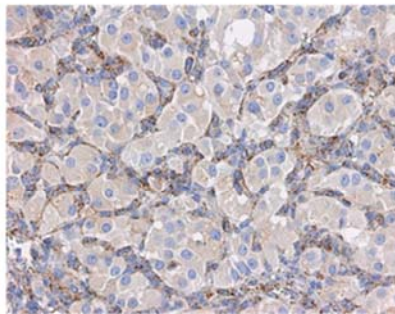

**SDHB**

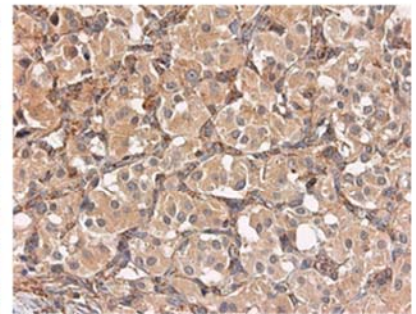

**SDHC**

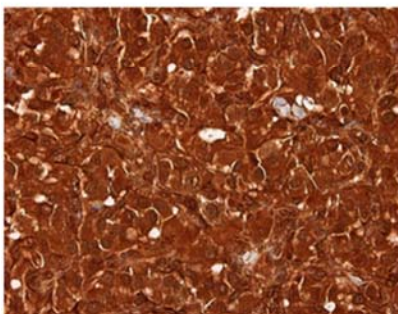

**SDHD**

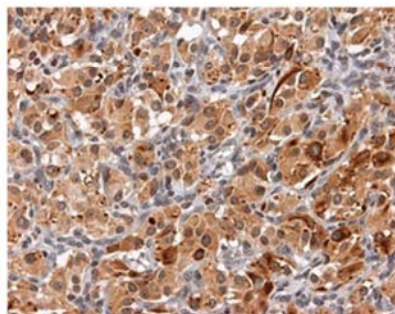



**Pat19**

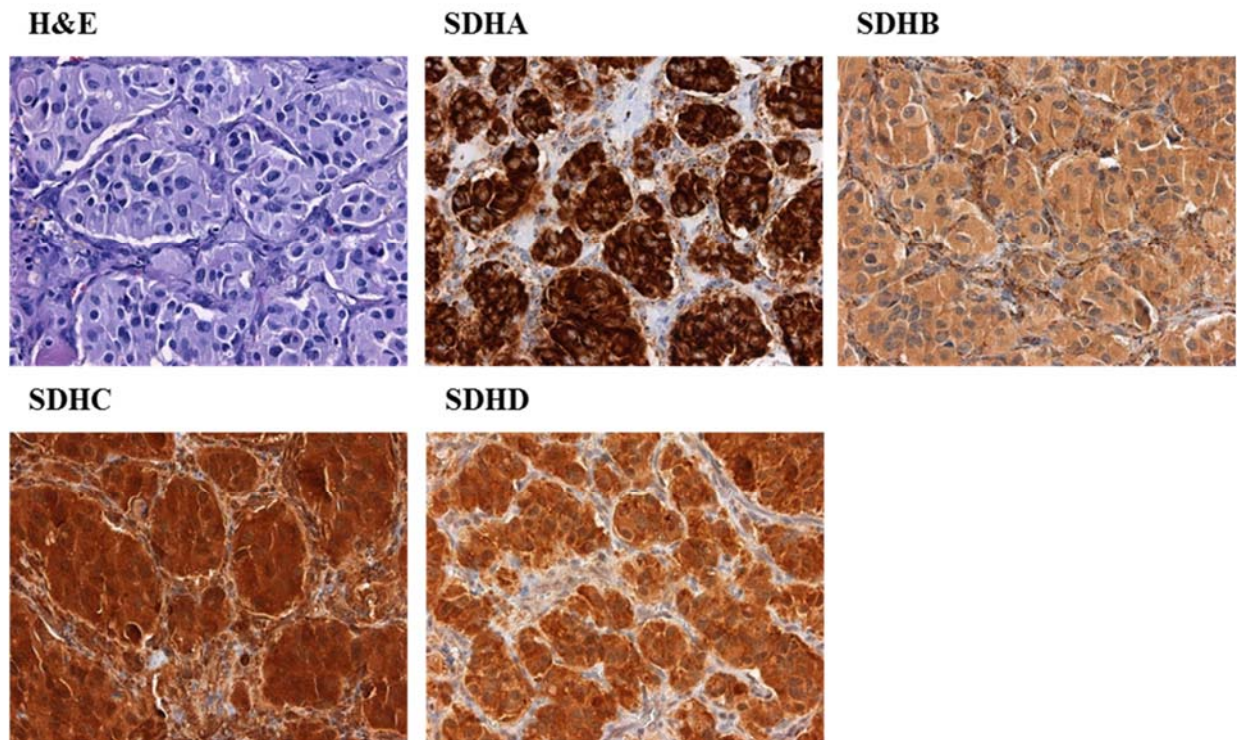

**Pat20**

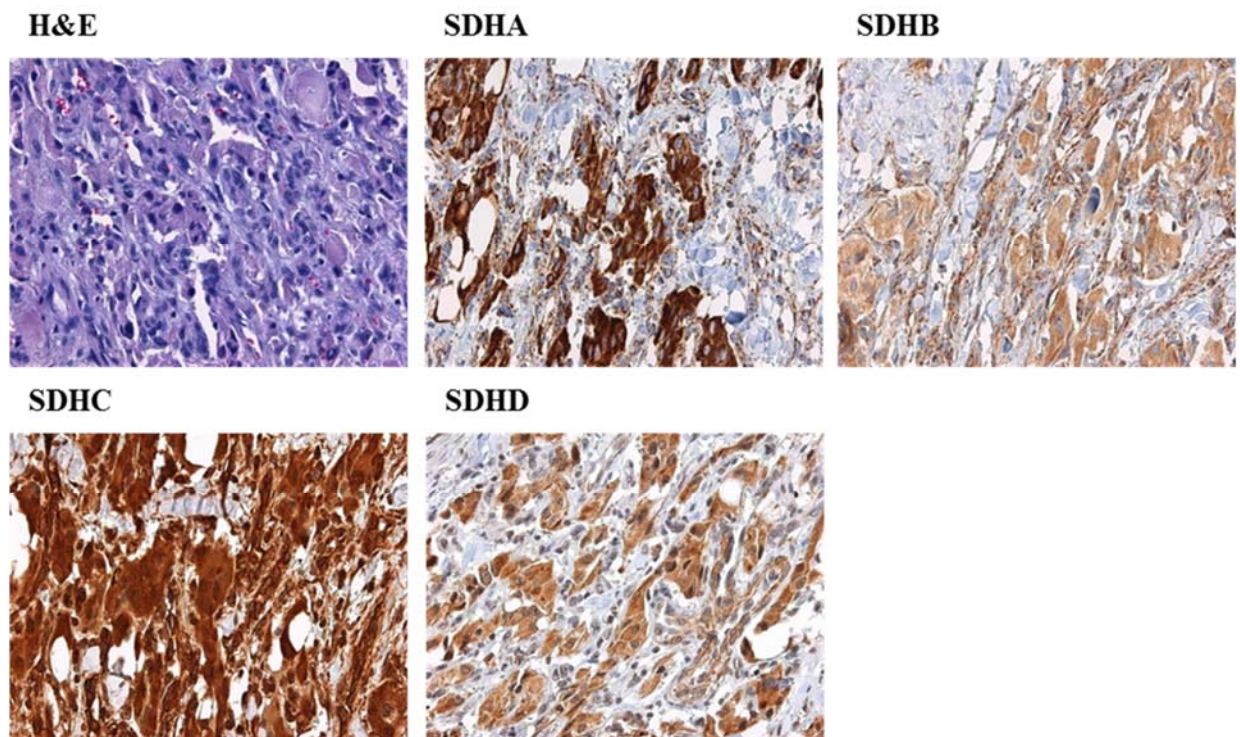



**Pat22**

**H&E**

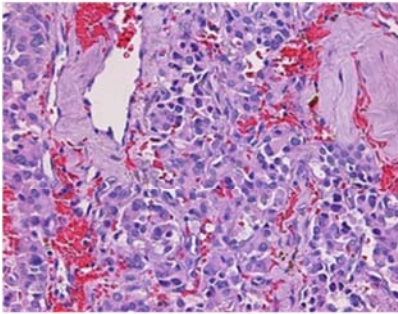

**SDHA**

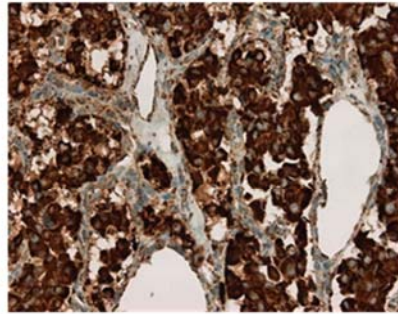

**SDHB**

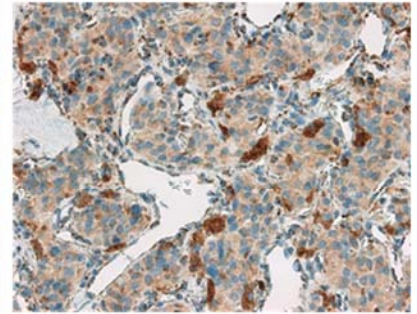

**SDHC**

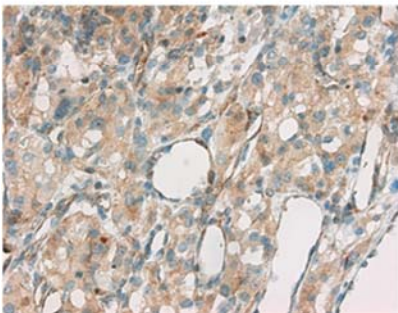

**SDHD**

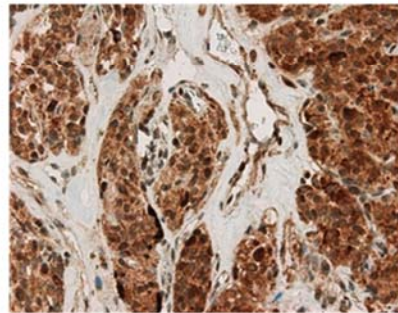

**Pat23**

**H&E**

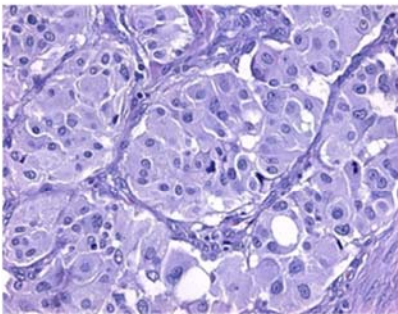

**SDHA**

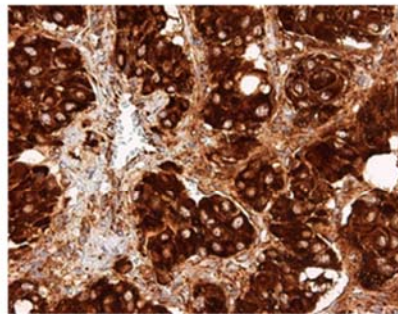

**SDHB**

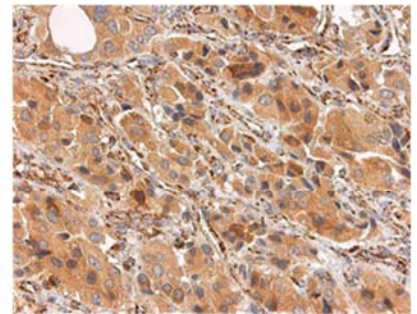

**SDHC**

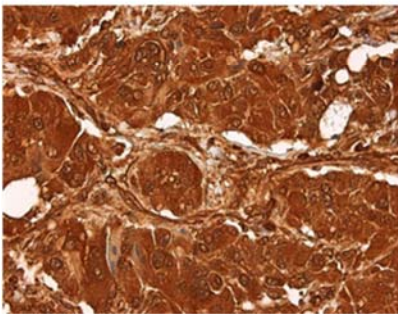

**SDHD**

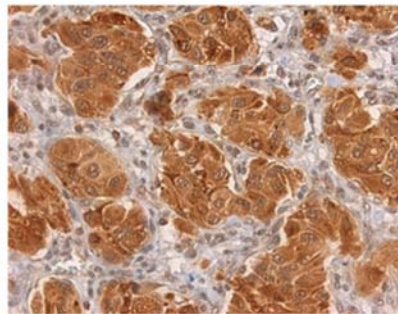



**Pat25**

**H&E**

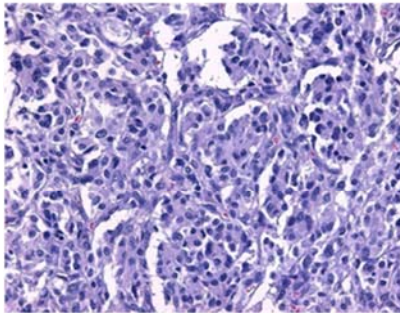

**SDHA**

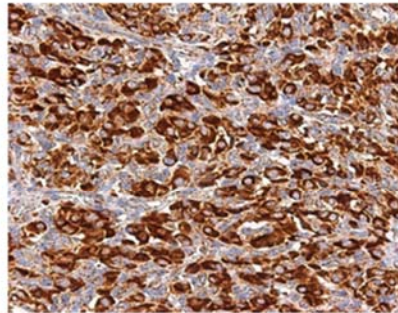

**SDHB**

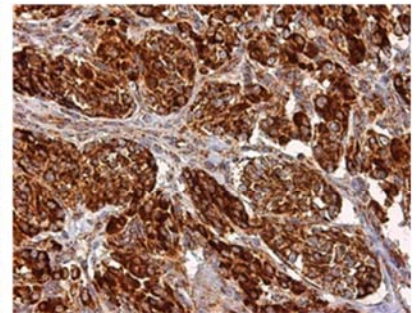

**SDHC**

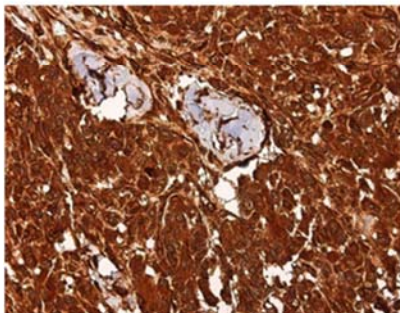

**SDHD**

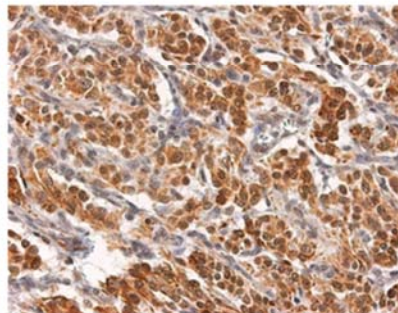

**Pat27**

**H&E**

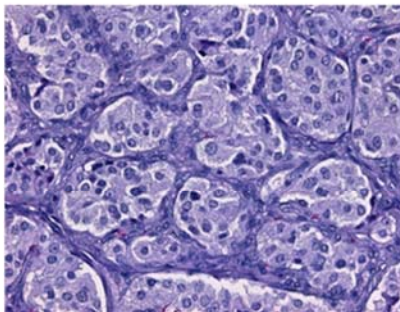

**SDHA**

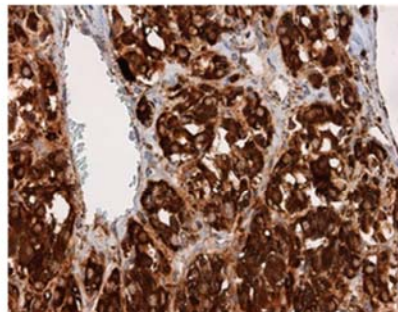

**SDHB**

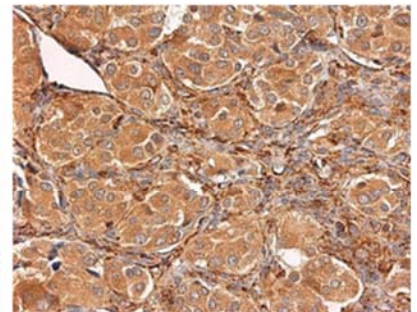

**SDHC**

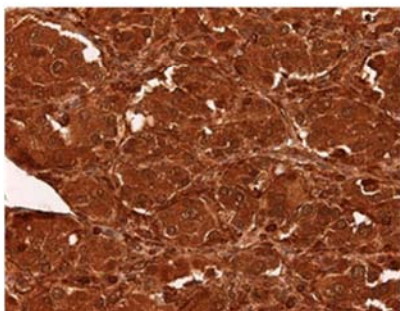

**SDHD**

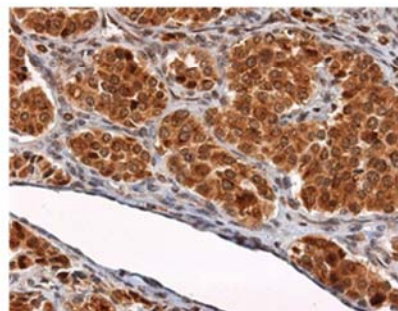



**Pat29**

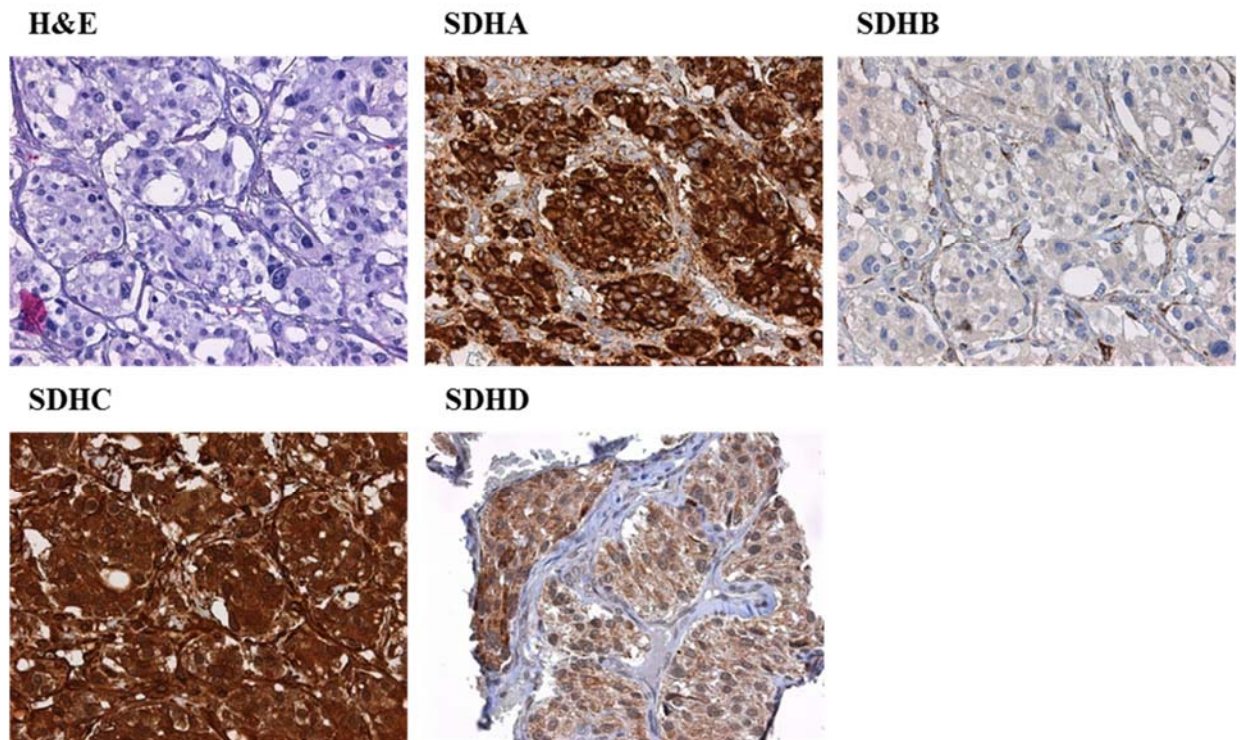

**Pat30**

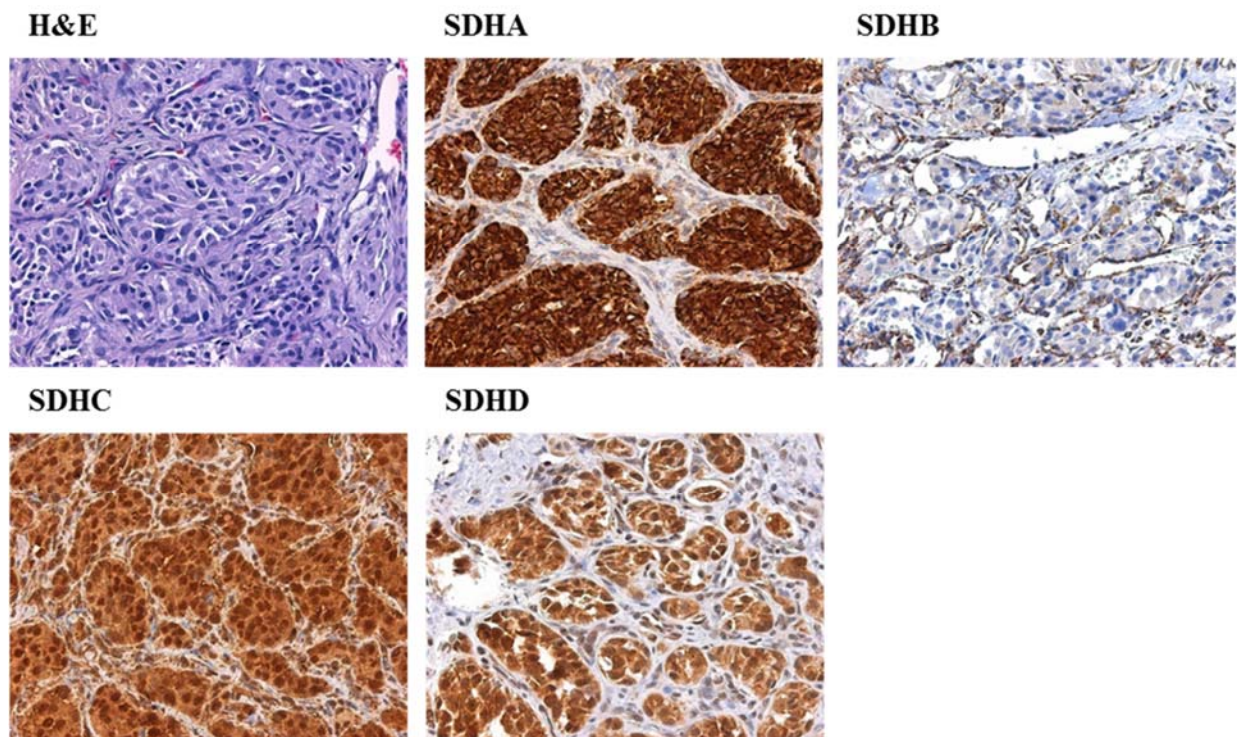



**Pat31**

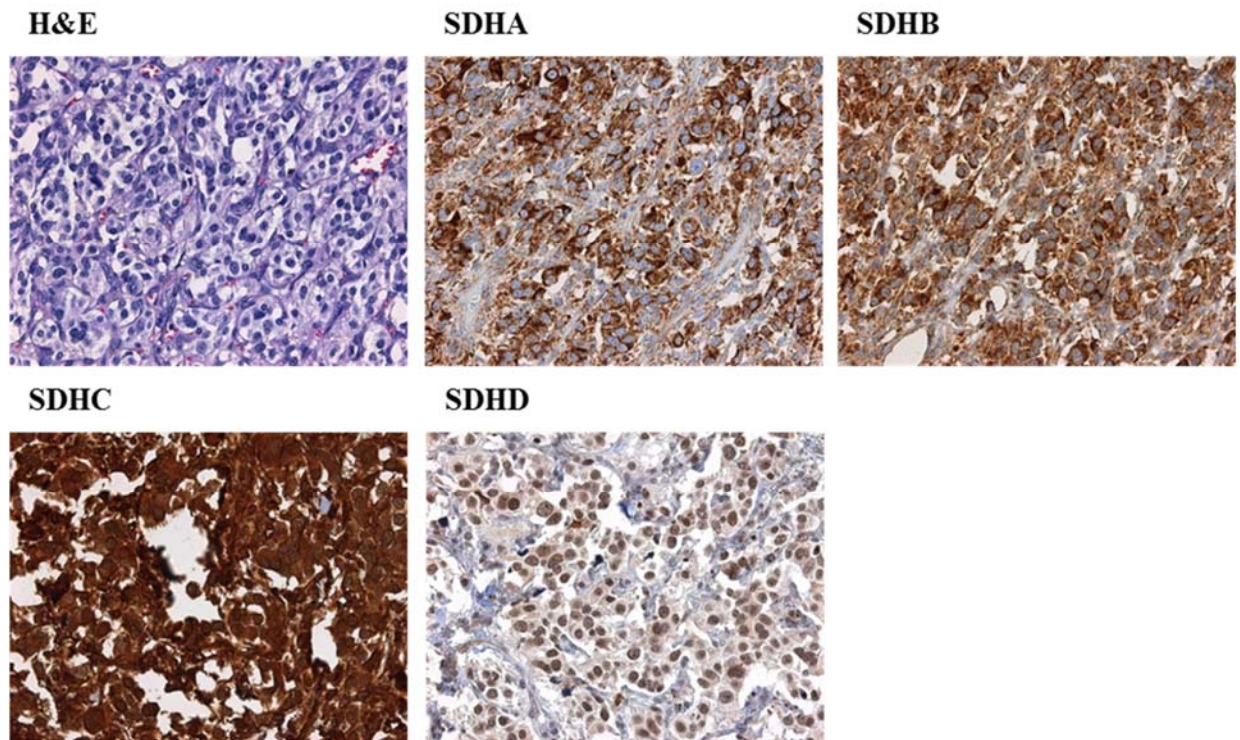

**Pat32**

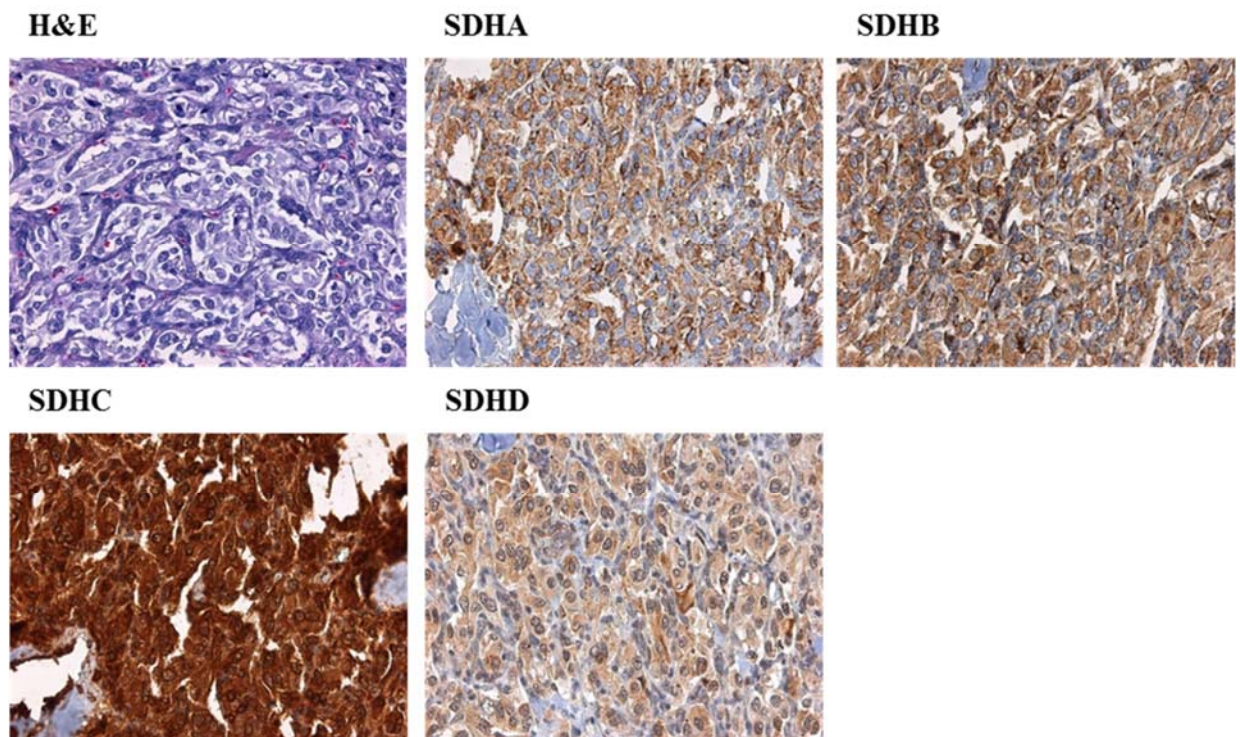



**Pat33**

**H&E**

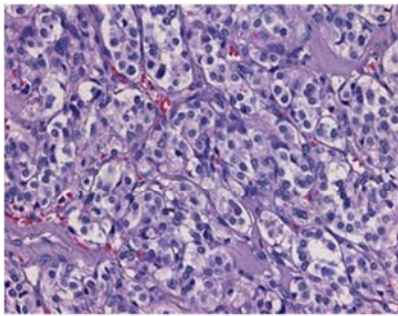

**SDHA**

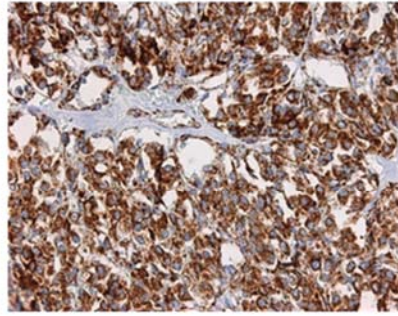

**SDHB**

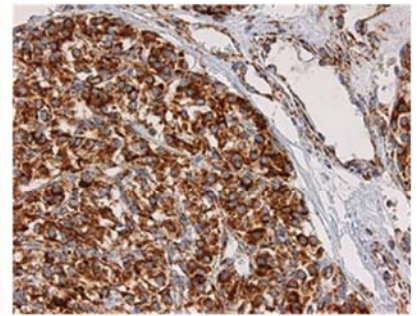

**SDHC**

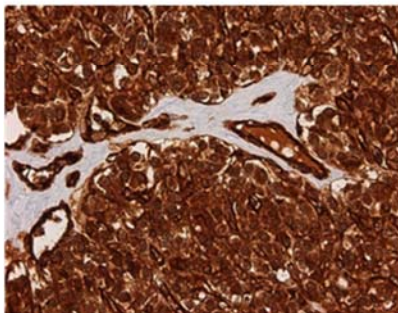

**SDHD**

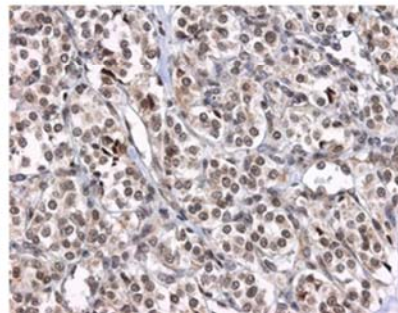

**Pat35**

**H&E**

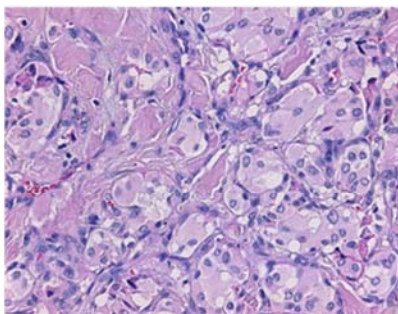

**SDHA**

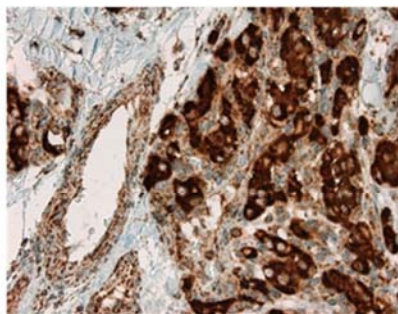

**SDHB**

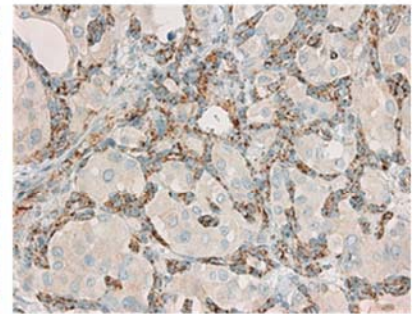

**SDHC**

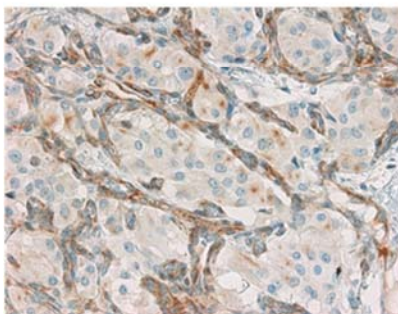

**SDHD**

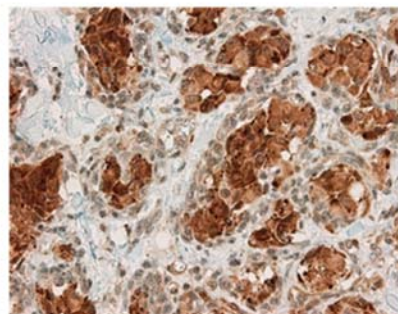



**Pat36**

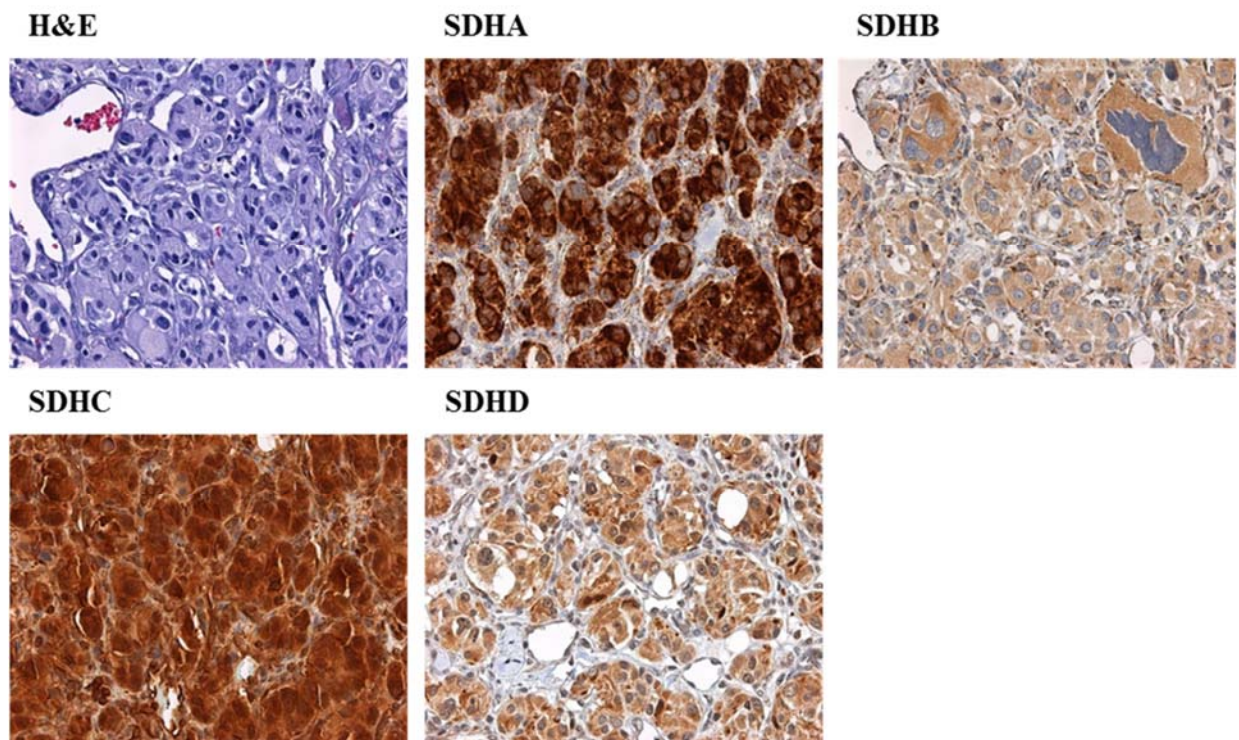

**Pat37**

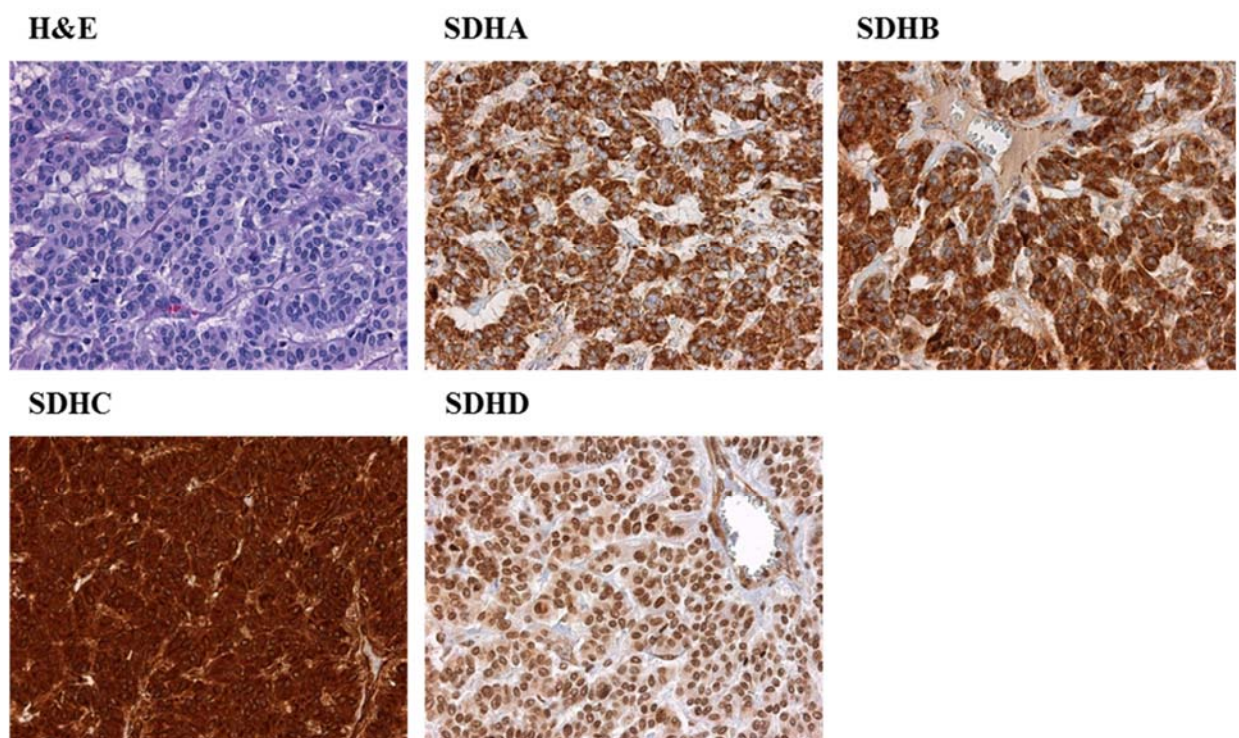



**Pat41**

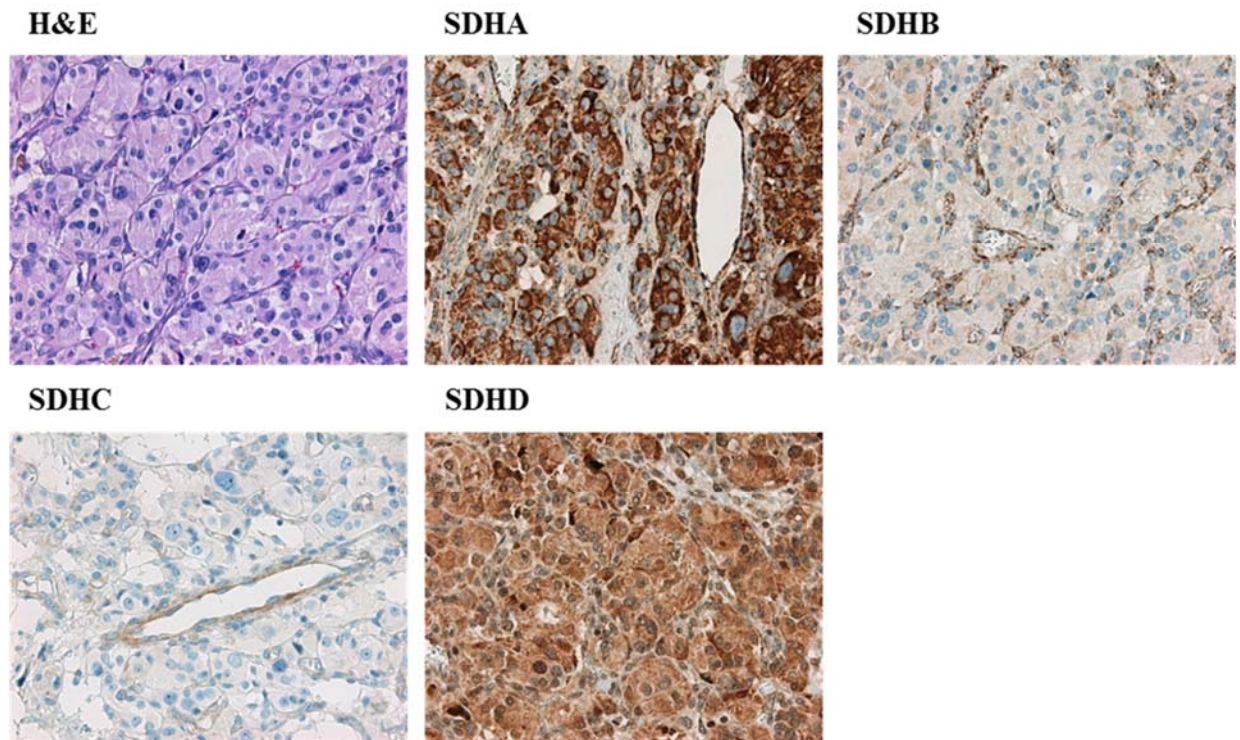

**Pat42**

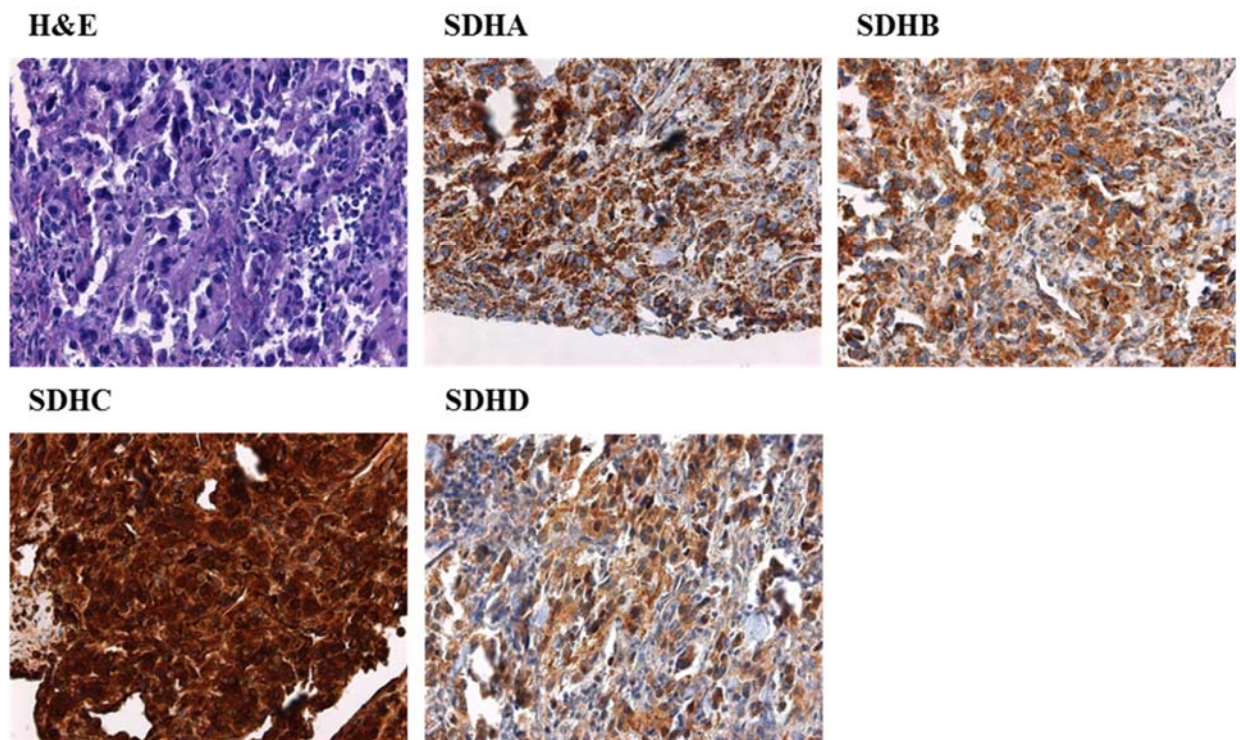



**Pat43**

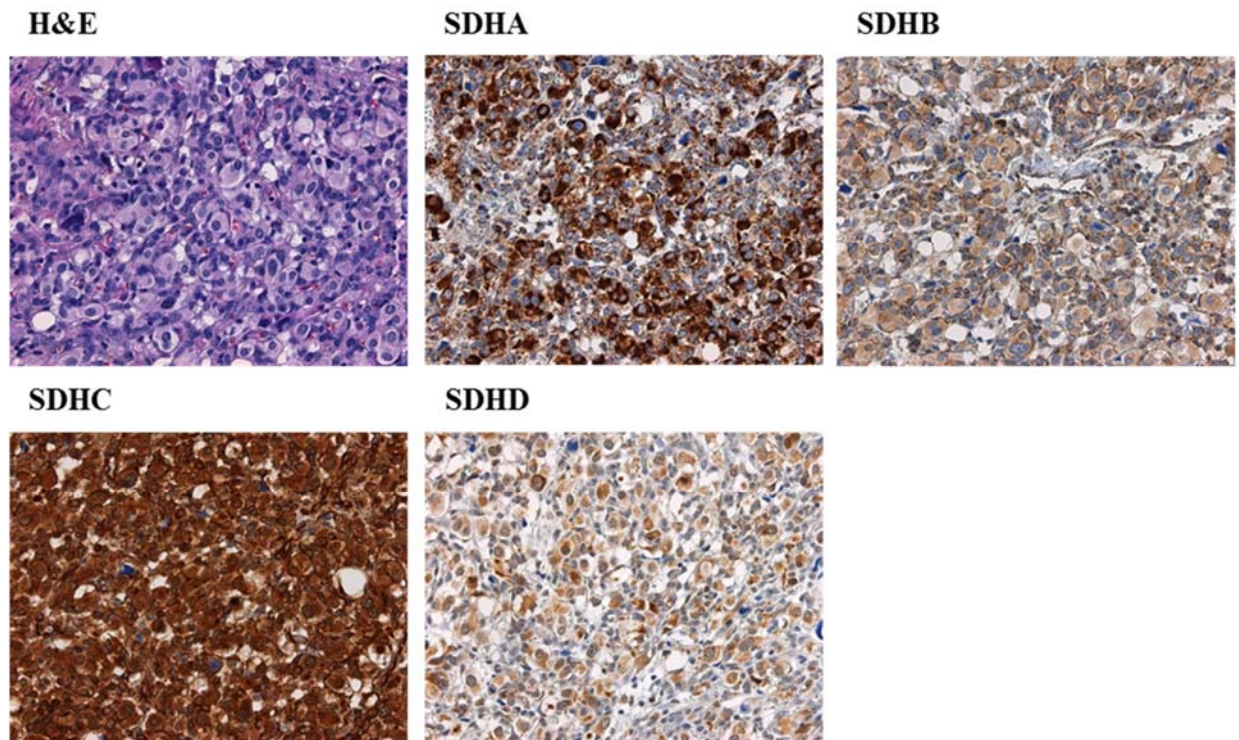

**Pat46**

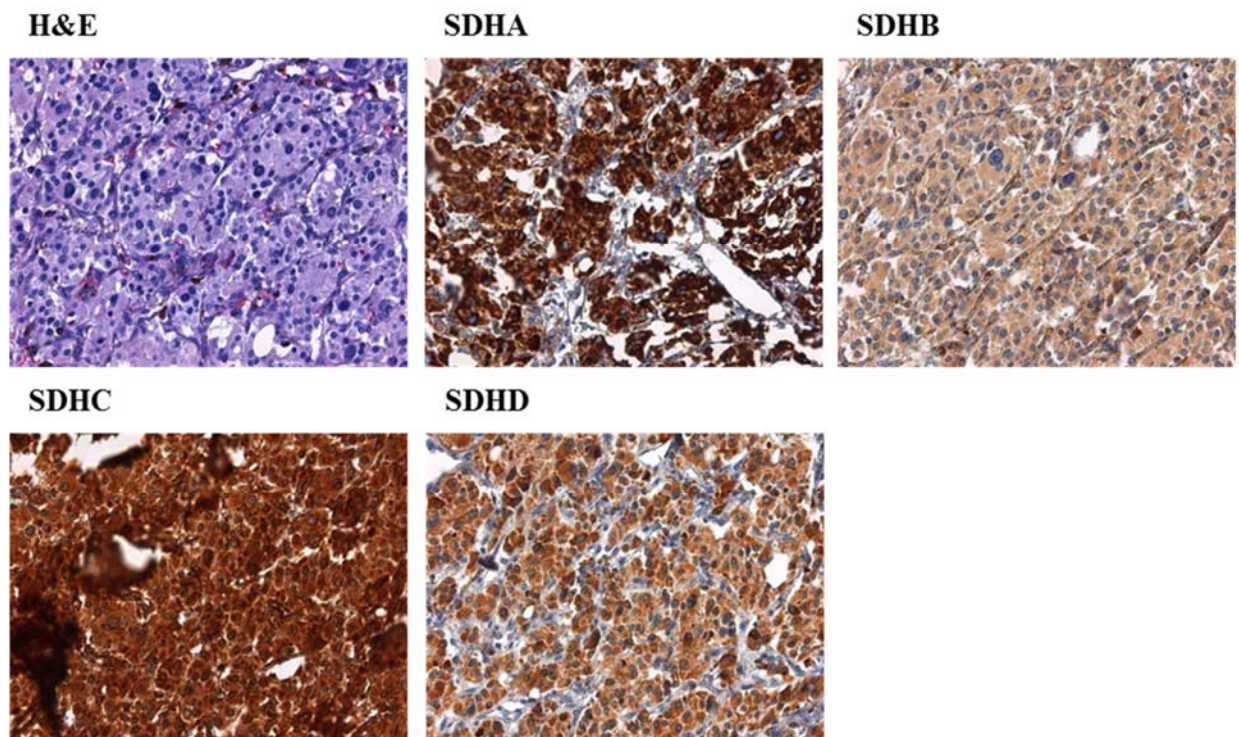



**Pat48**

**H&E**

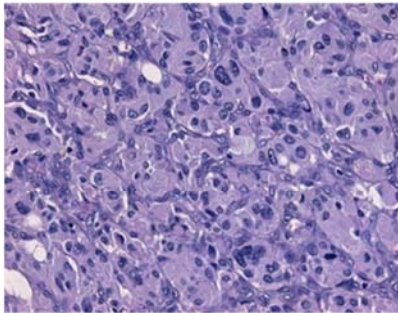

**SDHA**

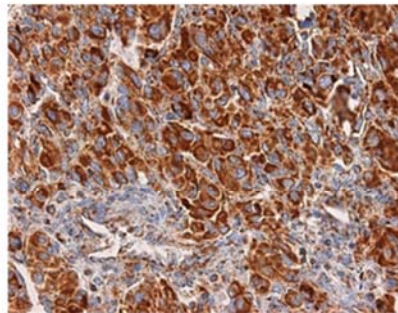

**SDHB**

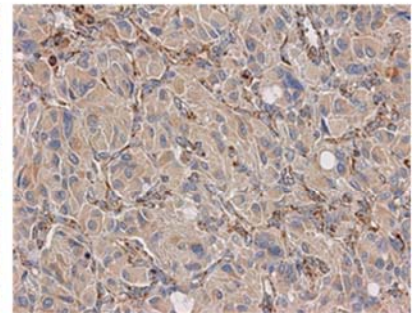

**SDHC**

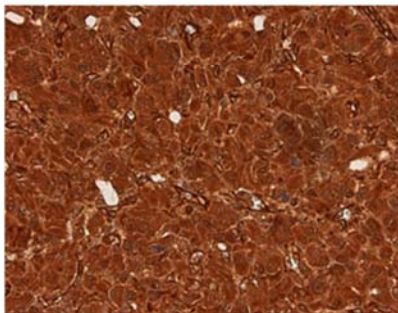

**SDHD**

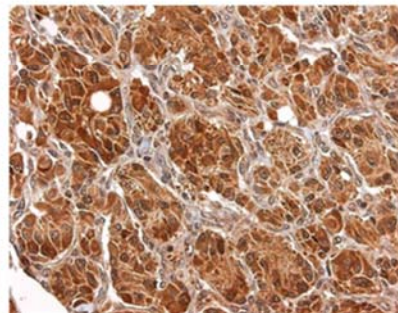

**Pat51**

**H&E**

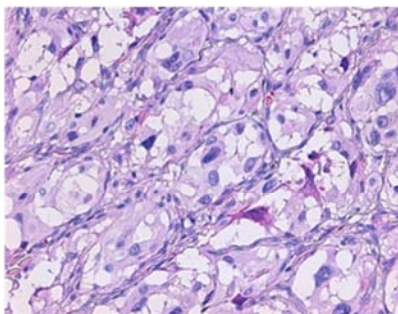

**SDHA**

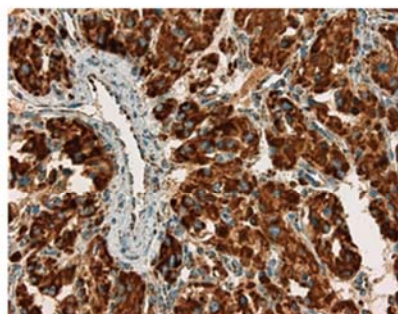

**SDHB**

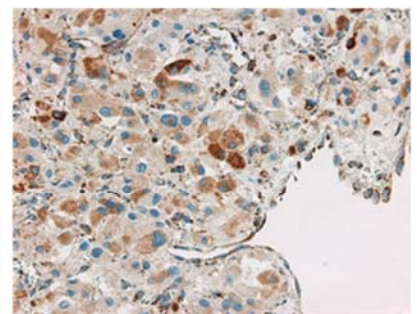

**SDHC**

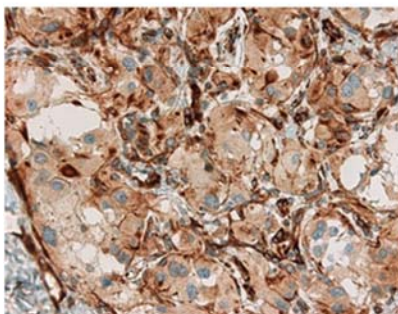

**SDHD**

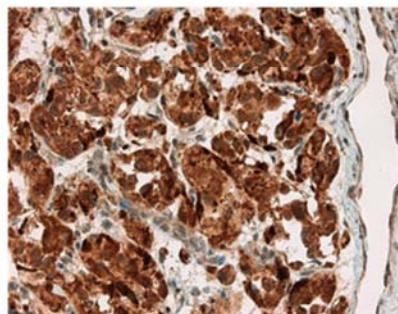



**Pat53**

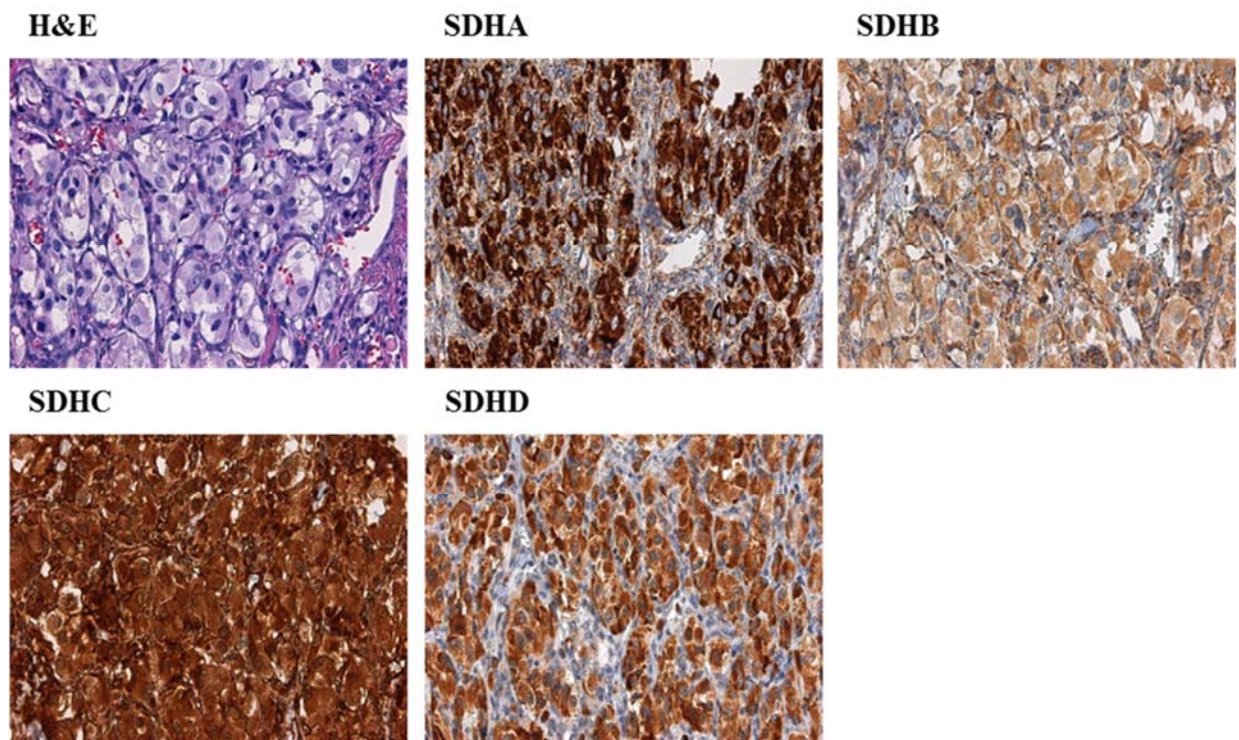

**Pat54**

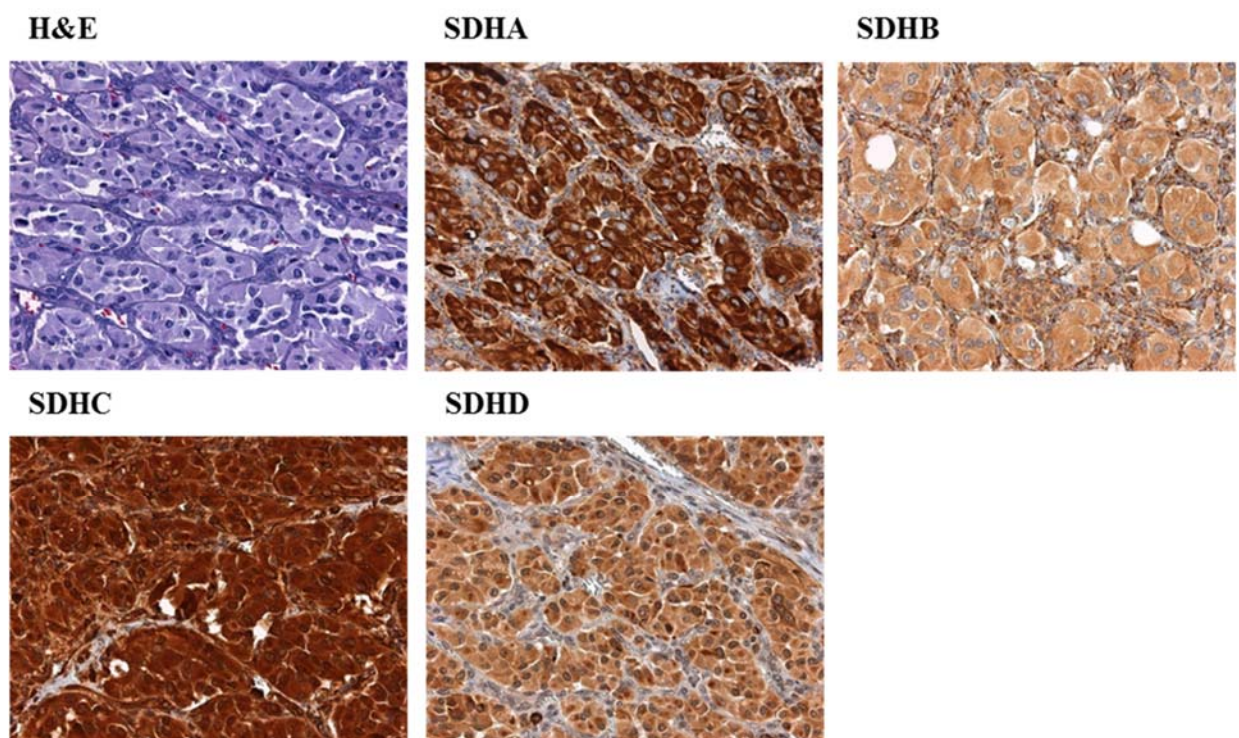



**Pat55**

**H&E**

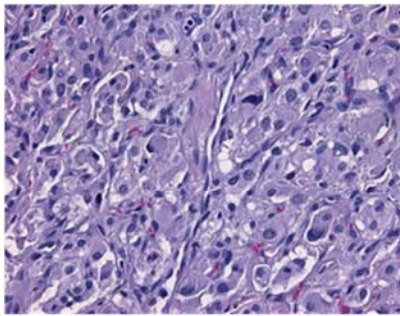

**SDHA**

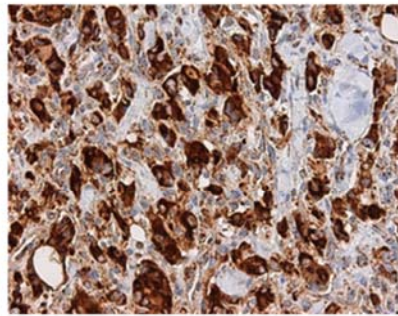

**SDHB**

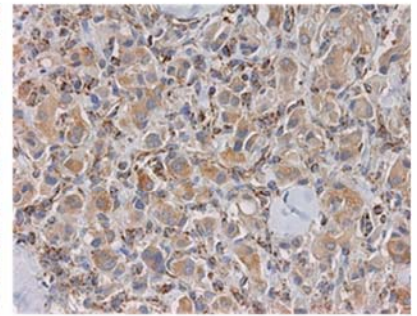

**SDHC**

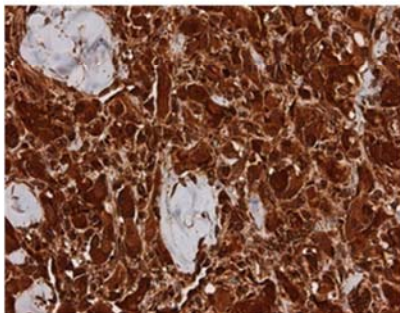

**SDHD**

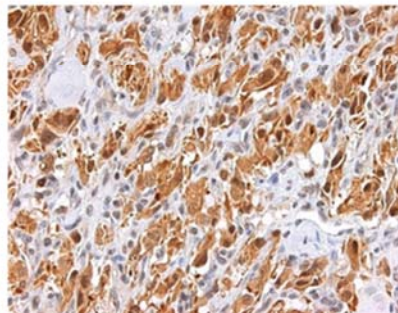

**Pat57**

**H&E**

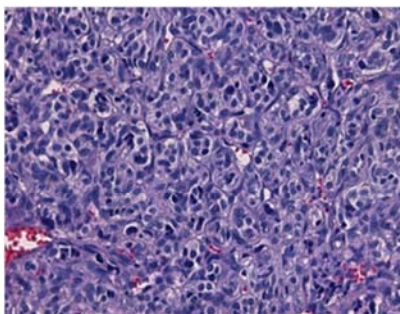

**SDHA**

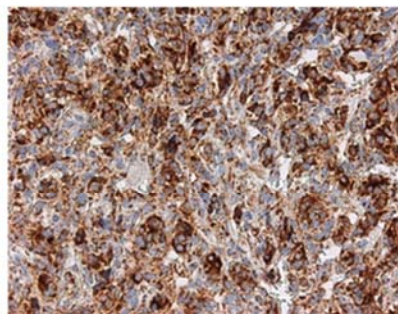

**SDHB**

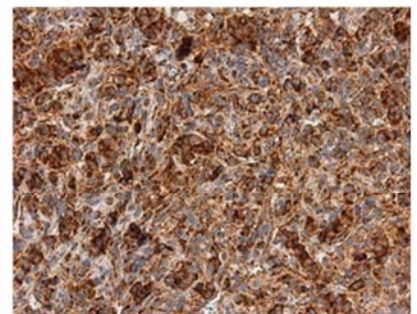

**SDHC**

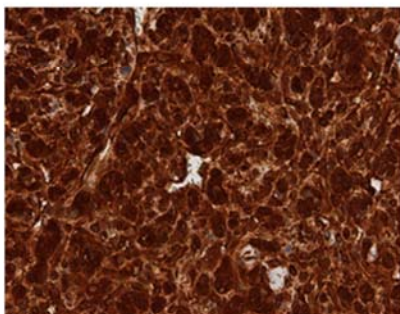

**SDHD**

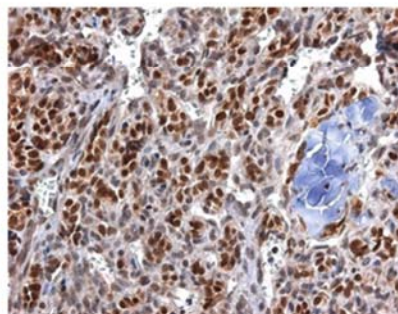



**Pat59**

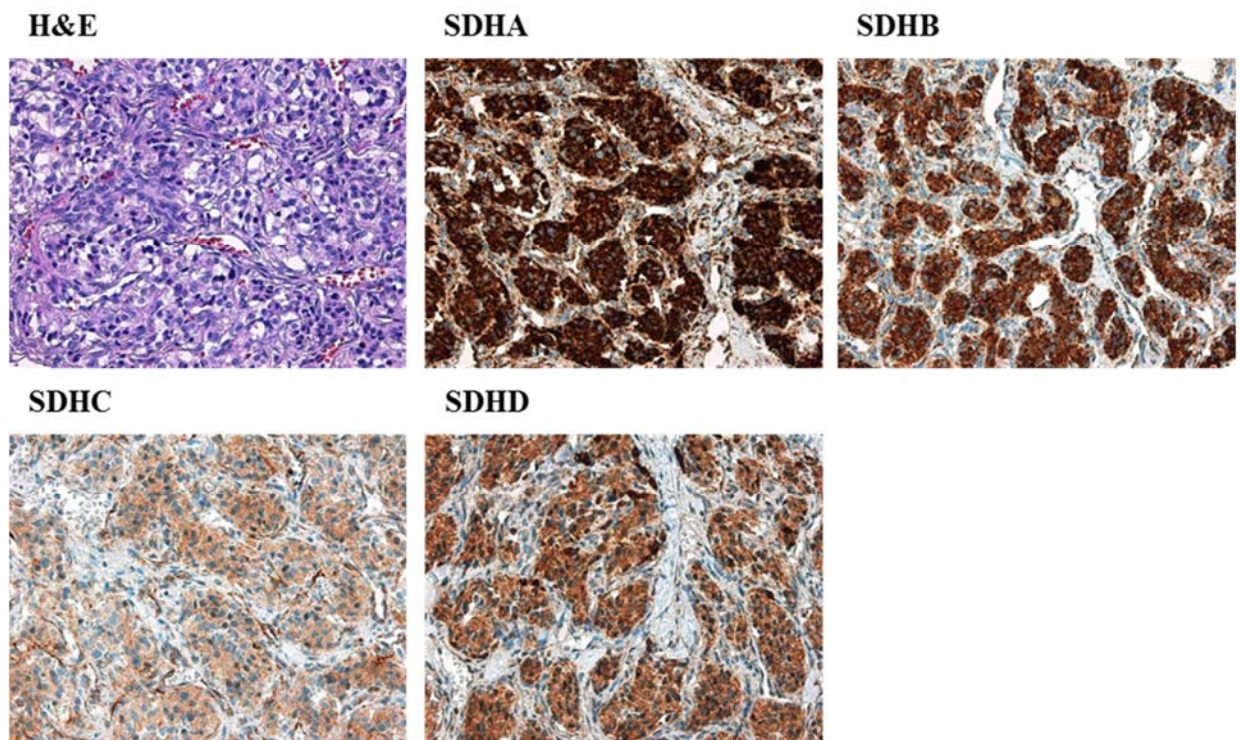

**Pat69**

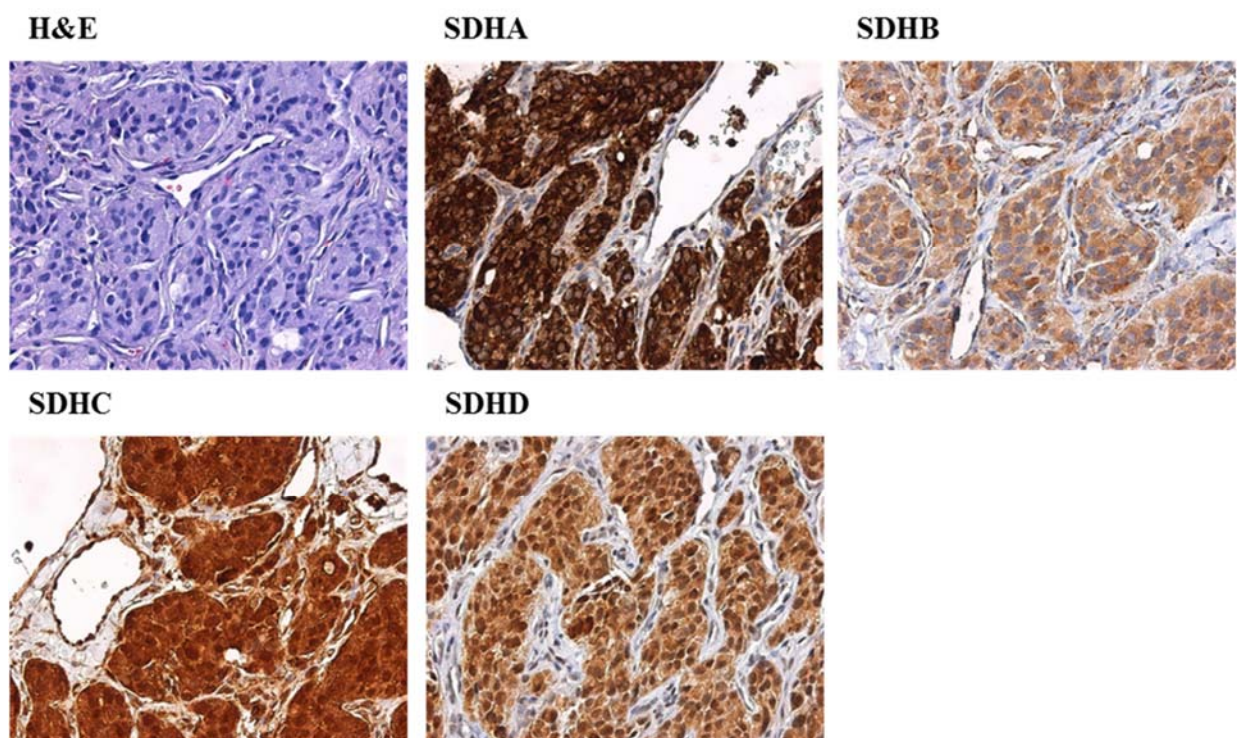



**Pat71**

**H&E**

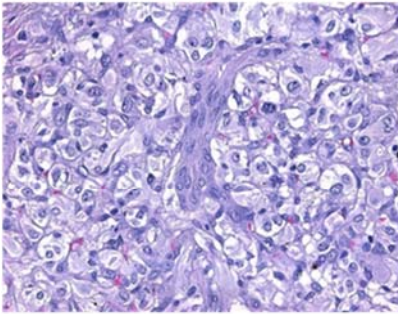

**SDHA**

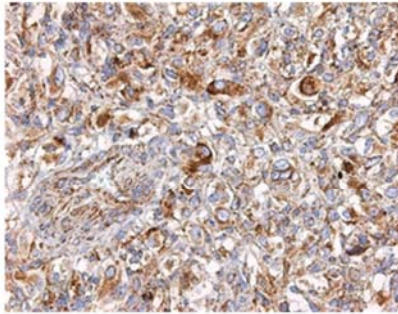

**SDHB**

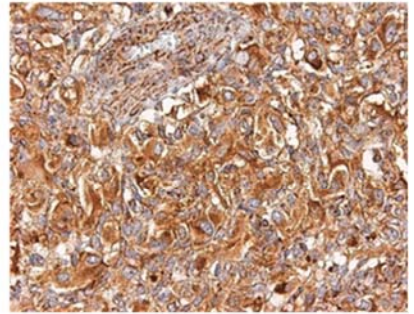

**SDHC**

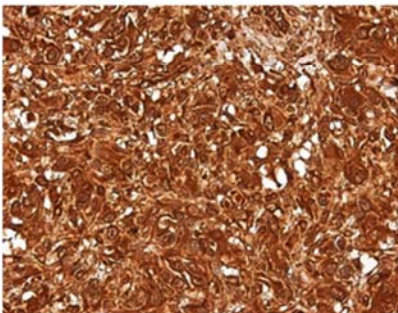

**SDHD**

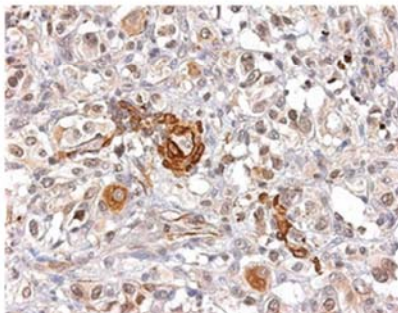

**Pat100**

**H&E**

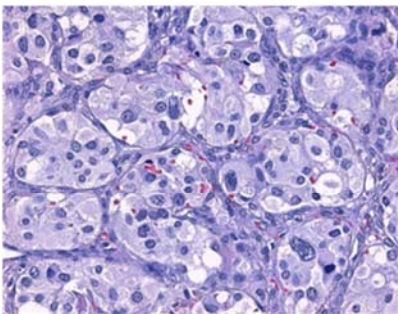

**SDHA**

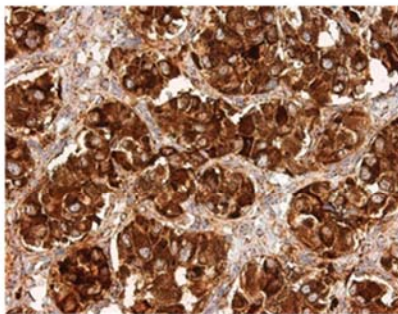

**SDHB**

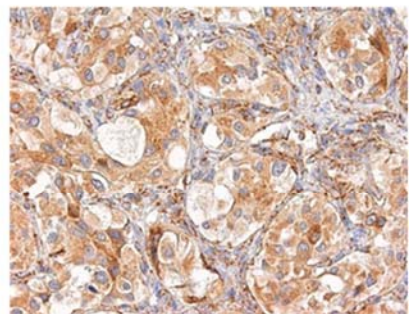

**SDHC**

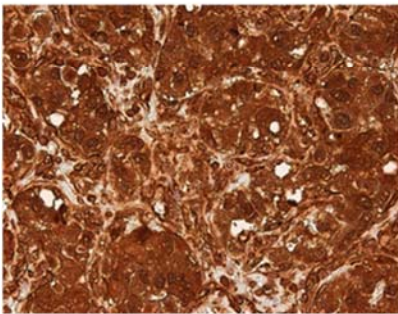

**SDHD**

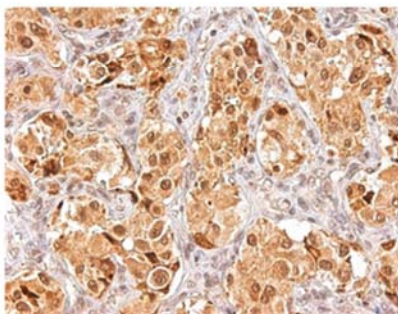



**Pat101**

**H&E**

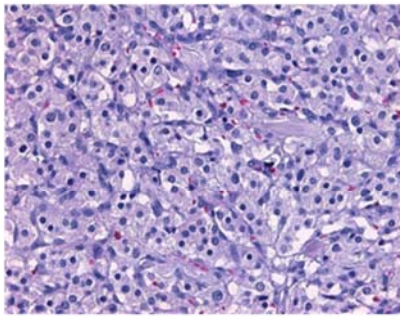

**SDHA**

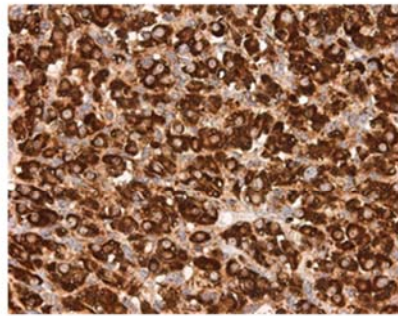

**SDHB**

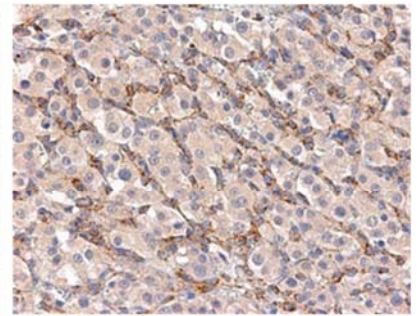

**SDHC**

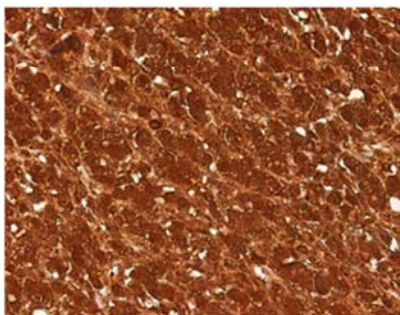

**SDHD**

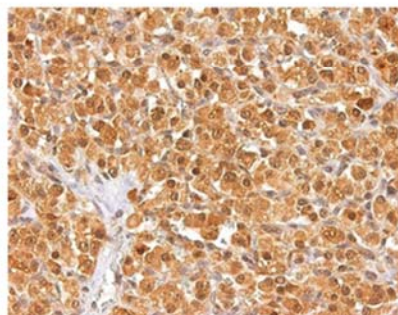

**Pat104**

**H&E**

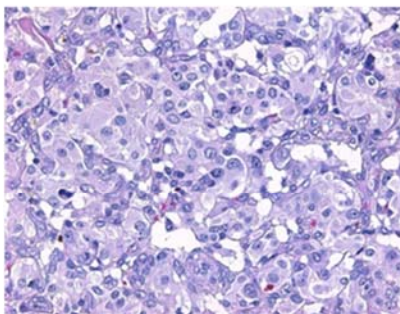

**SDHA**

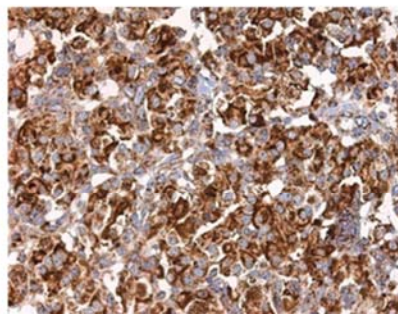

**SDHB**

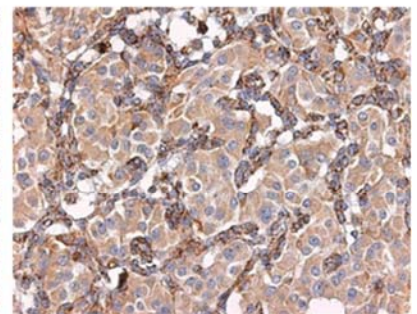

**SDHC**

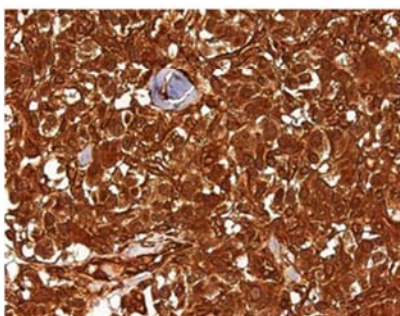

**SDHD**

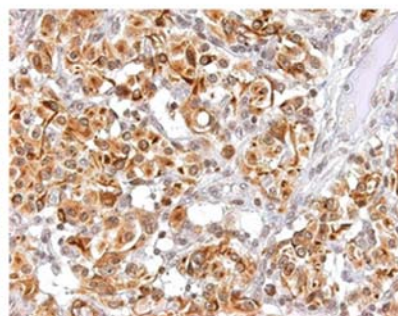

Supplement: s1 [file s1]
