# Supplementary material for: Immunohistochemistry and Mutation Analysis of SDHx Genes in Carotid Paragangliomas
Source: MDPI journal article supplement (doi:10.3390/ijms21186950), 2020-09-22
Supplement: s1 [file s1]

**Table S1.** Correlation between *SDHx* variants and immunohistochemistry results.

| Patient | <i>SDHx</i> gene mutated | Immunohistochemistry |      |      |      | Pathogenic/likely pathogenic mutations in other genes tested |
|---------|--------------------------|----------------------|------|------|------|--------------------------------------------------------------|
|         |                          | SDHA                 | SDHB | SDHC | SDHD |                                                              |
| Pat02   | <i>SDHD</i>              | +                    | *    | +    | +    |                                                              |
| Pat03   | <i>SDHD</i>              | +                    | *    | +    | +    |                                                              |
| Pat04   | No                       | +                    | +    | +    | +    |                                                              |
| Pat05   | <i>SDHD</i>              | +                    | -    | +    | +    |                                                              |
| Pat06   | <i>SDHB</i>              | +                    | -    | +    | +    |                                                              |
| Pat07   | <i>SDHD</i>              | +                    | *    | +    | +    |                                                              |
| Pat08   | No                       | +                    | *    | +    | +    |                                                              |
| Pat09   | No                       | +                    | +    | +    | +    |                                                              |
| Pat10   | <i>SDHC</i>              | +                    | *    | +    | +    |                                                              |
| Pat12   | No                       | +                    | +    | +    | +    |                                                              |
| Pat14   | No                       | +                    | +    | +    | +    |                                                              |
| Pat16   | <i>SDHA</i>              | -                    | *    | +    | +    | <i>RET</i>                                                   |
| Pat19   | No                       | +                    | *    | +    | +    |                                                              |
| Pat20   | No                       | +                    | *    | +    | +    |                                                              |
| Pat22   | <i>SDHD</i>              | +                    | *    | +    | +    |                                                              |
| Pat23   | No                       | +                    | +    | +    | +    |                                                              |
| Pat25   | No                       | +                    | +    | +    | +    |                                                              |
| Pat27   | <i>SDHC</i>              | +                    | *    | +    | +    | <i>RET</i>                                                   |
| Pat29   | No                       | +                    | -    | +    | +    |                                                              |
| Pat30   | No                       | +                    | -    | +    | +    |                                                              |
| Pat31   | No                       | +                    | +    | +    | +    | <i>IDH1</i>                                                  |

|        |             |   |   |   |   |            |
|--------|-------------|---|---|---|---|------------|
| Pat32  | No          | + | + | + | + |            |
| Pat33  | No          | + | + | + | + |            |
| Pat35  | <i>SDHD</i> | + | − | + | + | <i>RET</i> |
| Pat36  | No          | + | * | + | + |            |
| Pat37  | No          | + | + | + | + |            |
| Pat41  | <i>SDHC</i> | + | − | − | + |            |
| Pat42  | No          | + | + | + | + |            |
| Pat43  | No          | + | + | + | + |            |
| Pat46  | No          | + | * | + | + |            |
| Pat48  | No          | + | * | + | + |            |
| Pat51  | No          | + | * | + | + |            |
| Pat53  | No          | + | * | + | + |            |
| Pat54  | No          | + | * | + | + |            |
| Pat55  | <i>SDHD</i> | + | * | + | + |            |
| Pat57  | No          | + | + | + | + |            |
| Pat59  | No          | + | + | + | + |            |
| Pat69  | <i>SDHD</i> | + | + | + | + |            |
| Pat71  | No          | + | + | + | + |            |
| Pat100 | <i>SDHD</i> | + | * | + | + |            |
| Pat101 | <i>SDHB</i> | + | − | + | + |            |
| Pat104 | <i>SDHD</i> | + | * | + | + |            |

(+) - positive staining; (-) – negative staining; (\*) - weak diffuse staining.
