# Supplementary figures and images for: Immunohistochemistry and Mutation Analysis of SDHx Genes in Carotid Paragangliomas
Source: MDPI journal article supplement (doi:10.3390/ijms21186950), 2020-09-22

**SDHA**

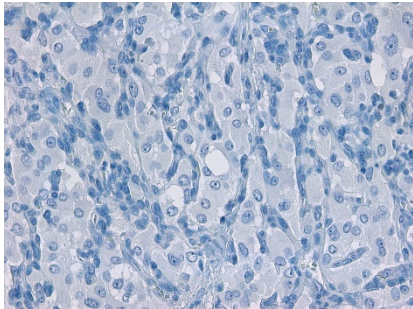

**SDHB**

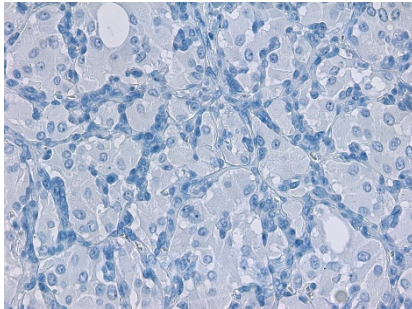

**SDHC**

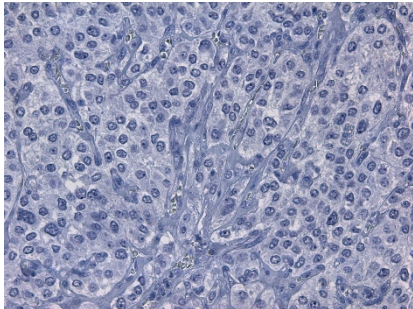

**SDHD**

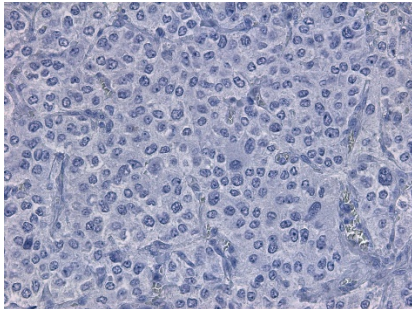

Supplement: s1 [file s1]
